# Supplementary material for: Sinensiols H–J, three new lignan derivatives from Selaginella sinensis (Desv.) Spring
Source: publisher site journal article supplement (doi:10.3762/bjoc.18.146), 2022-10-07
Supplement: Additional file 1 [file 1860-5397-18-146-S1.pdf]

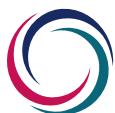

## Supporting Information

for

### **Sinensiols H–J, three new lignan derivatives from *Selaginella sinensis* (Desv.) Spring**

Qinfeng Zhu, Beibei Gao, Qian Chen, Tiantian Luo, Guobo Xu and Shangao Liao

*Beilstein J. Org. Chem.* **2022**, *18*, 1410–1415. doi:10.3762/bjoc.18.146

### **ECD calculation method of compound 1 and HPLC analysis of 3 and NMR, MS, and IR spectra of compounds 1–3**

| <b>Table of contents</b>                                                                                                | <b>Page</b> |
|-------------------------------------------------------------------------------------------------------------------------|-------------|
| <b>Figure S1.</b> <sup>1</sup> H NMR spectrum of <b>1</b> in DMSO- <i>d</i> <sub>6</sub>                                | S2          |
| <b>Figure S2.</b> <sup>13</sup> C NMR spectrum of <b>1</b> in DMSO- <i>d</i> <sub>6</sub>                               | S2          |
| <b>Figure S3.</b> HSQC spectrum of <b>1</b> in DMSO- <i>d</i> <sub>6</sub>                                              | S3          |
| <b>Figure S4.</b> HMBC spectrum of <b>1</b> in DMSO- <i>d</i> <sub>6</sub>                                              | S3          |
| <b>Figure S5.</b> <sup>1</sup> H- <sup>1</sup> H COSY spectrum of <b>1</b> in DMSO- <i>d</i> <sub>6</sub>               | S4          |
| <b>Figure S6.</b> ROESY spectrum of <b>1</b> in DMSO- <i>d</i> <sub>6</sub>                                             | S4          |
| <b>Figure S7.</b> <sup>1</sup> H NMR spectrum of <b>1</b> in CDCl <sub>3</sub>                                          | S5          |
| <b>Figure S8.</b> <sup>13</sup> C NMR spectrum of <b>1</b> in CDCl <sub>3</sub>                                         | S5          |
| <b>Figure S9.</b> HSQC spectrum of <b>1</b> in CDCl <sub>3</sub>                                                        | S6          |
| <b>Figure S10.</b> HMBC spectrum of <b>1</b> in CDCl <sub>3</sub>                                                       | S6          |
| <b>Figure S11.</b> <sup>1</sup> H- <sup>1</sup> H COSY spectrum of <b>1</b> in CDCl <sub>3</sub>                        | S7          |
| <b>Figure S12.</b> ROESY spectrum of <b>1</b> in CDCl <sub>3</sub>                                                      | S7          |
| <b>Figure S13.</b> HRESIMS spectrum of <b>1</b>                                                                         | S8          |
| <b>Figure S14.</b> IR spectrum of <b>1</b>                                                                              | S9          |
| <b>Figure S15.</b> UV spectrum of <b>1</b>                                                                              | S9          |
| <b>Figure S16.</b> Experimental ECD curves of compounds <b>1</b>                                                        | S10         |
| <b>ECD calculation method of compound 1</b>                                                                             |             |
| <b>Figure S17.</b> Experimental and calculated ECD spectra of <b>1</b>                                                  | S10         |
| <b>Figure S18.</b> Optimized lowest energy conformers for (8 <i>R</i> ,8' <i>S</i> )- <b>1</b> at B3LYP/6-31G(d) level. | S11         |
| <b>Table S1.</b> Energy (298.15 K) analysis for (8 <i>R</i> ,8' <i>S</i> )- <b>1</b> .                                  | S11         |
| <b>Table S2.</b> Calculated ECD data for (8 <i>R</i> ,8' <i>S</i> )- <b>1</b>                                           | S12         |
| <b>Figure S19.</b> <sup>1</sup> H NMR spectrum of <b>2</b> in MeOH- <i>d</i> <sub>4</sub>                               | S12         |
| <b>Figure S20.</b> <sup>13</sup> C NMR spectrum of <b>2</b> in MeOH- <i>d</i> <sub>4</sub>                              | S13         |
| <b>Figure S21.</b> HSQC spectrum of <b>2</b> in MeOH- <i>d</i> <sub>4</sub>                                             | S13         |
| <b>Figure S22.</b> HMBC spectrum of <b>2</b> in MeOH- <i>d</i> <sub>4</sub>                                             | S14         |
| <b>Figure S23.</b> <sup>1</sup> H- <sup>1</sup> H COSY spectrum of <b>2</b> in MeOH- <i>d</i> <sub>4</sub>              | S14         |
| <b>Figure S24.</b> ROESY spectrum of <b>2</b> in MeOH- <i>d</i> <sub>4</sub>                                            | S15         |
| <b>Figure S25.</b> HRESIMS spectrum of <b>2</b>                                                                         | S16         |
| <b>Figure S26.</b> IR spectrum of <b>2</b>                                                                              | S17         |
| <b>Figure S27.</b> UV spectrum of <b>2</b>                                                                              | S17         |
| <b>Figure S28.</b> HPLC analysis of <b>3</b> by a chiral-pak IA column                                                  | S18         |
| <b>Figure S29.</b> <sup>1</sup> H NMR spectrum of <b>3</b> in MeOH- <i>d</i> <sub>4</sub>                               | S19         |
| <b>Figure S30.</b> <sup>13</sup> C NMR spectrum of <b>3</b> in MeOH- <i>d</i> <sub>4</sub>                              | S19         |
| <b>Figure S31.</b> HSQC spectrum of <b>3</b> in MeOH- <i>d</i> <sub>4</sub>                                             | S20         |
| <b>Figure S32.</b> HMBC spectrum of <b>3</b> in MeOH- <i>d</i> <sub>4</sub>                                             | S20         |
| <b>Figure S33.</b> <sup>1</sup> H- <sup>1</sup> H COSY spectrum of <b>3</b> in MeOH- <i>d</i> <sub>4</sub>              | S21         |
| <b>Figure S34.</b> ROESY spectrum of <b>3</b> in MeOH- <i>d</i> <sub>4</sub>                                            | S21         |
| <b>Figure S35.</b> HRESIMS spectrum of <b>3</b>                                                                         | S22         |
| <b>Figure S36.</b> IR spectrum of <b>3</b>                                                                              | S23         |
| <b>Figure S37.</b> UV spectrum of <b>3</b>                                                                              | S23         |
| <b>Figure S38.</b> Experimental ECD curves of compounds <b>3</b>                                                        | S24         |

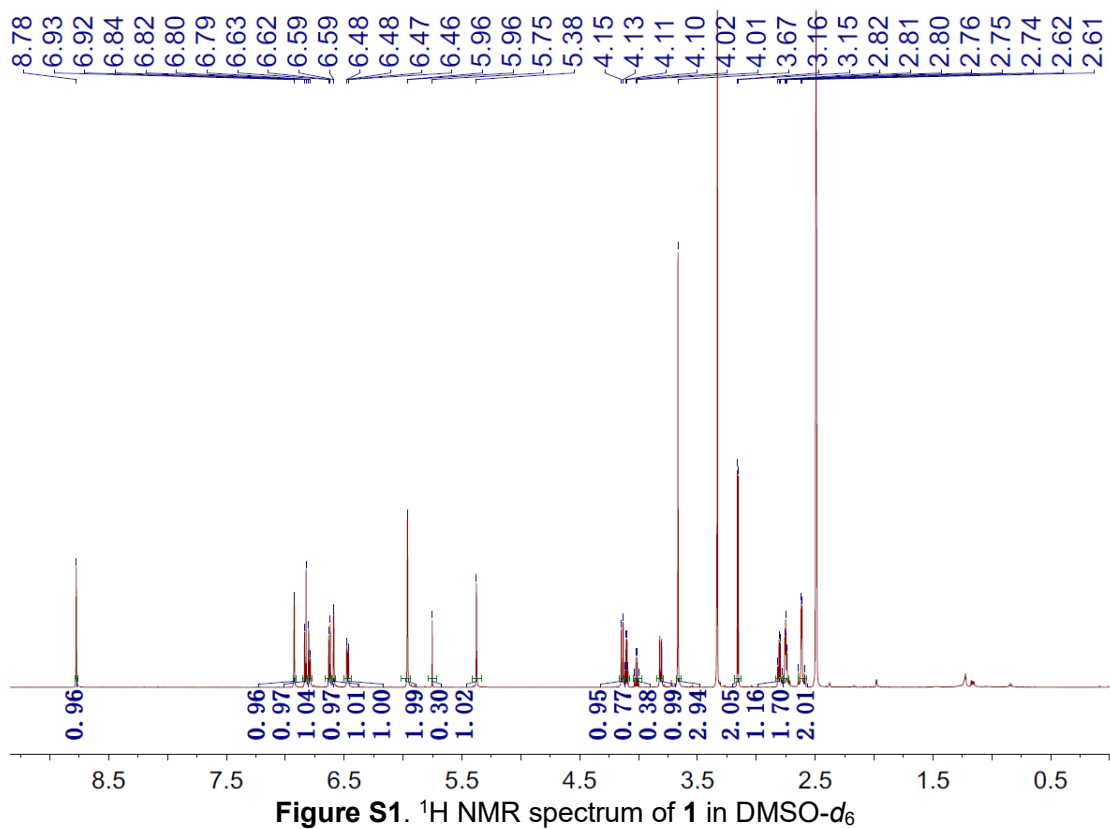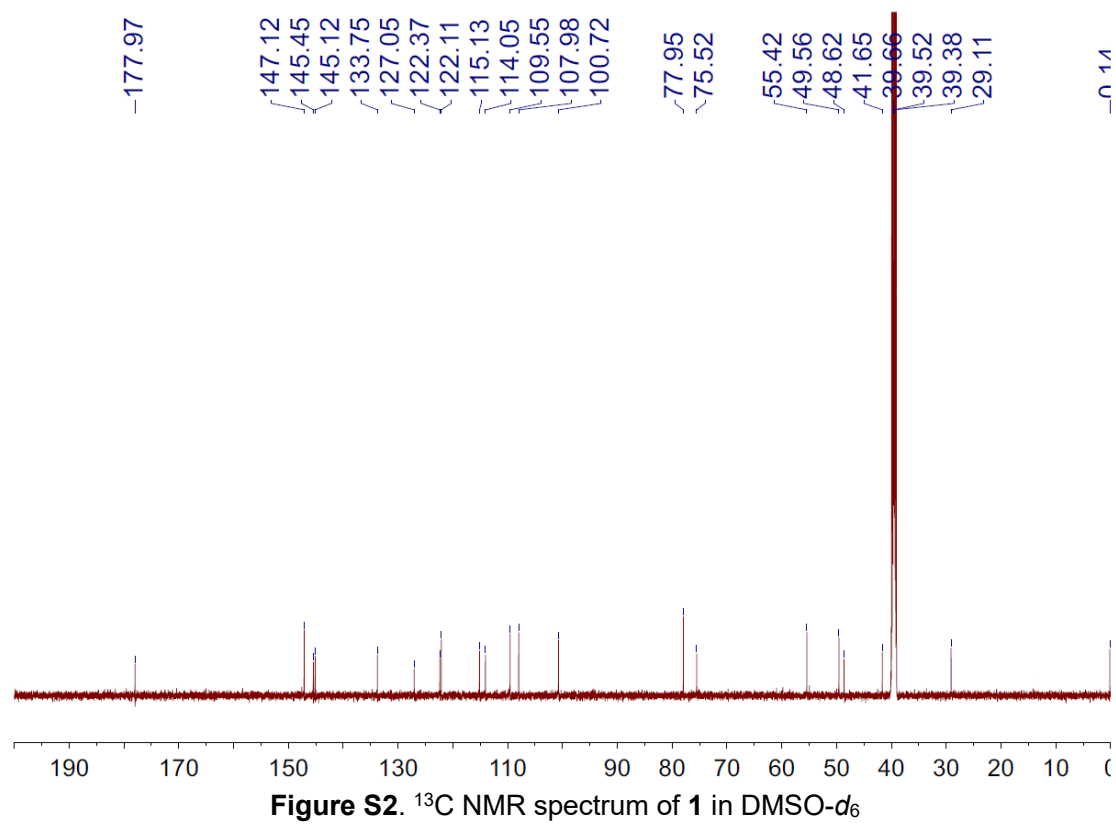

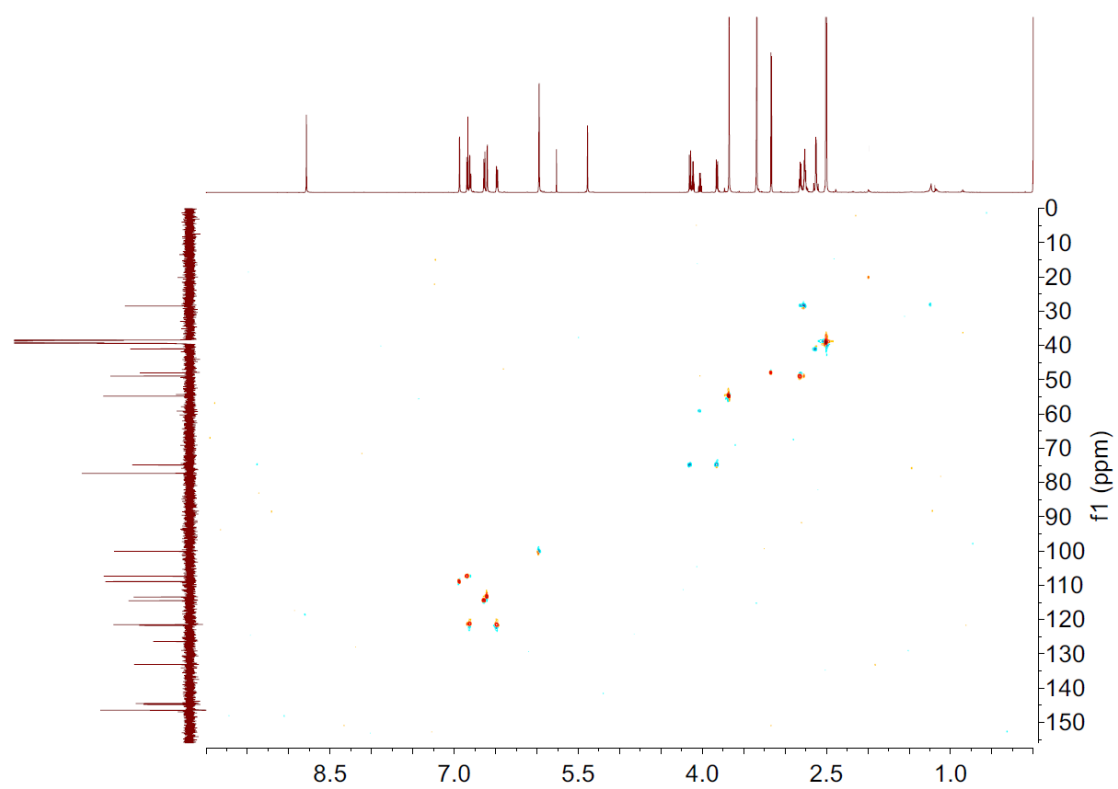

**Figure S3.** HSQC spectrum of **1** in DMSO- $d_6$

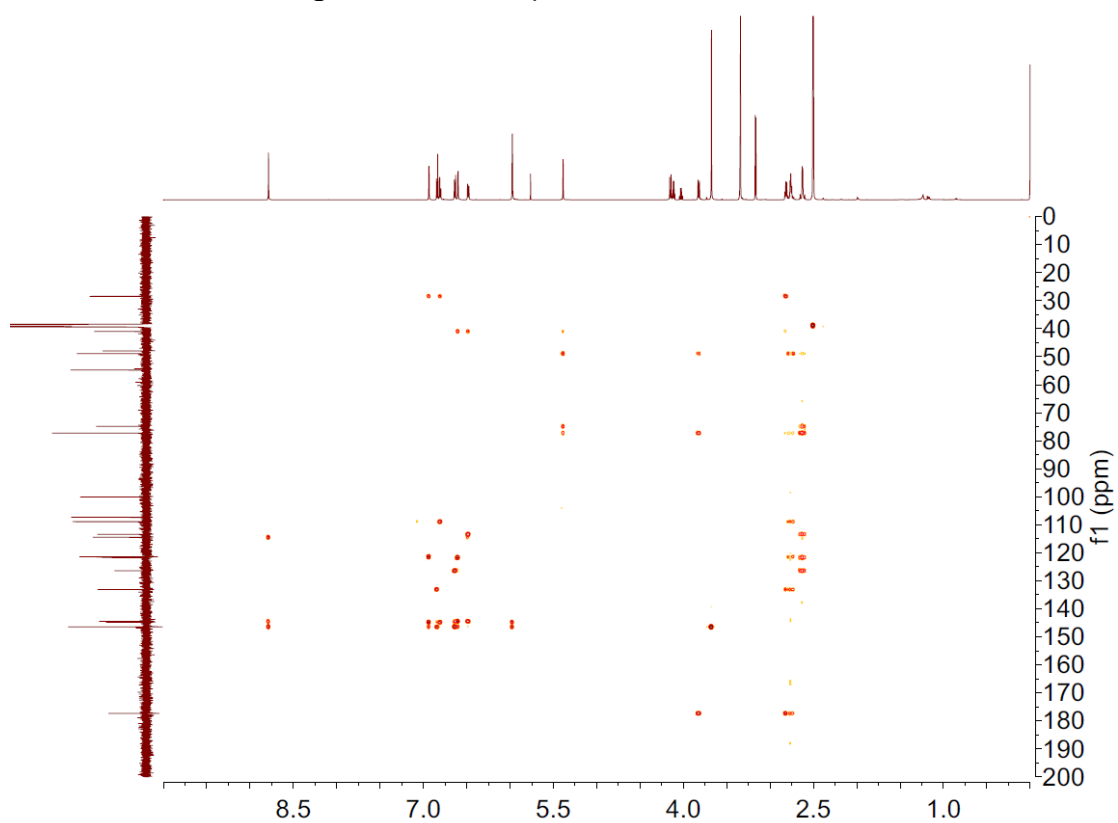

**Figure S4.** HMBC spectrum of **1** in DMSO- $d_6$

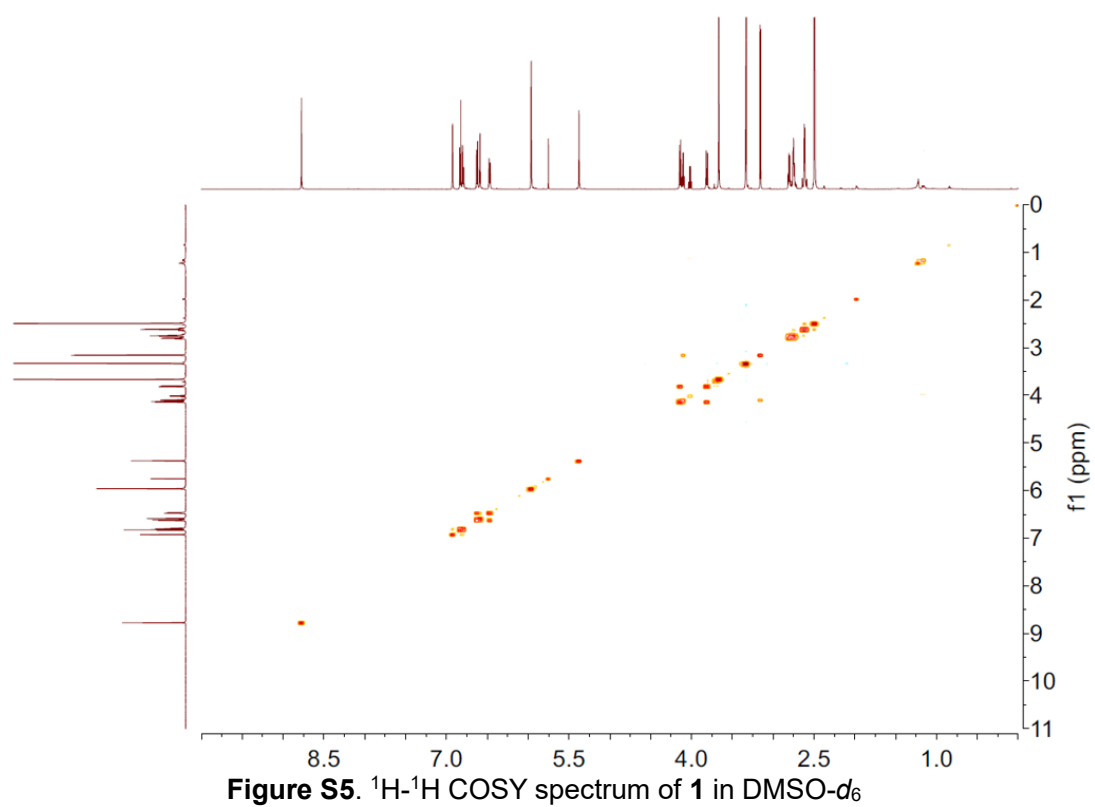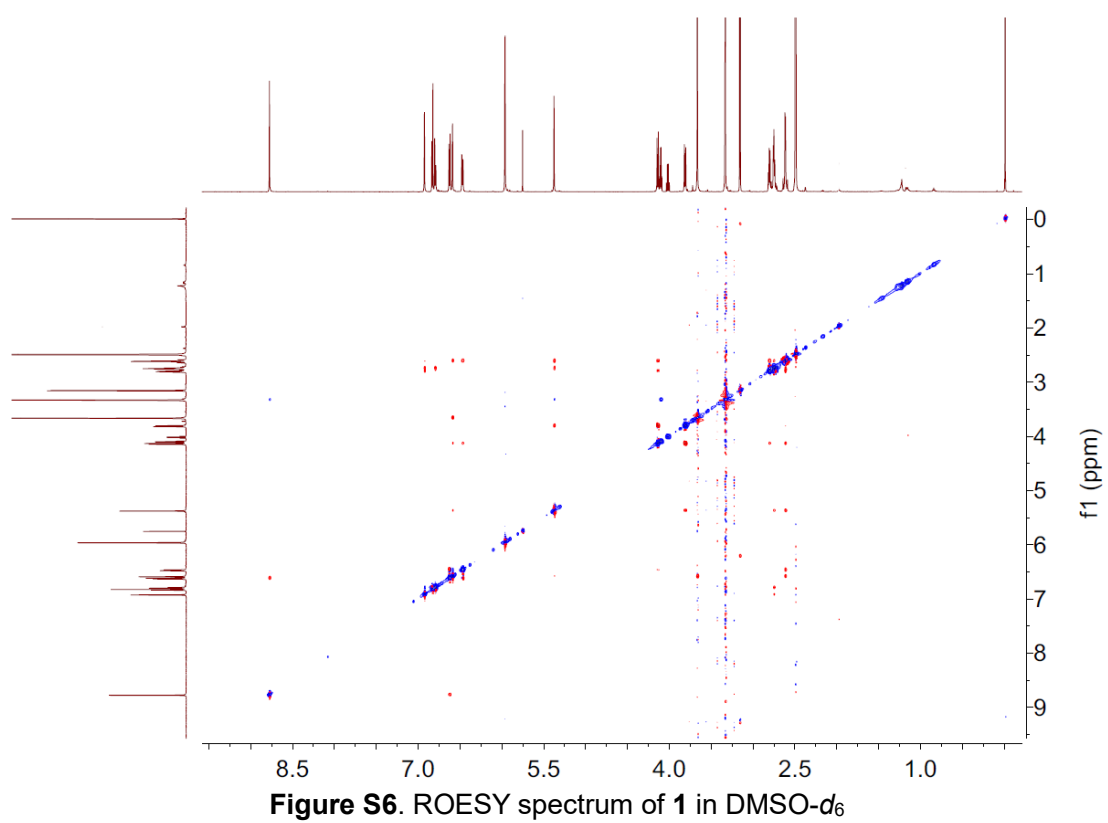

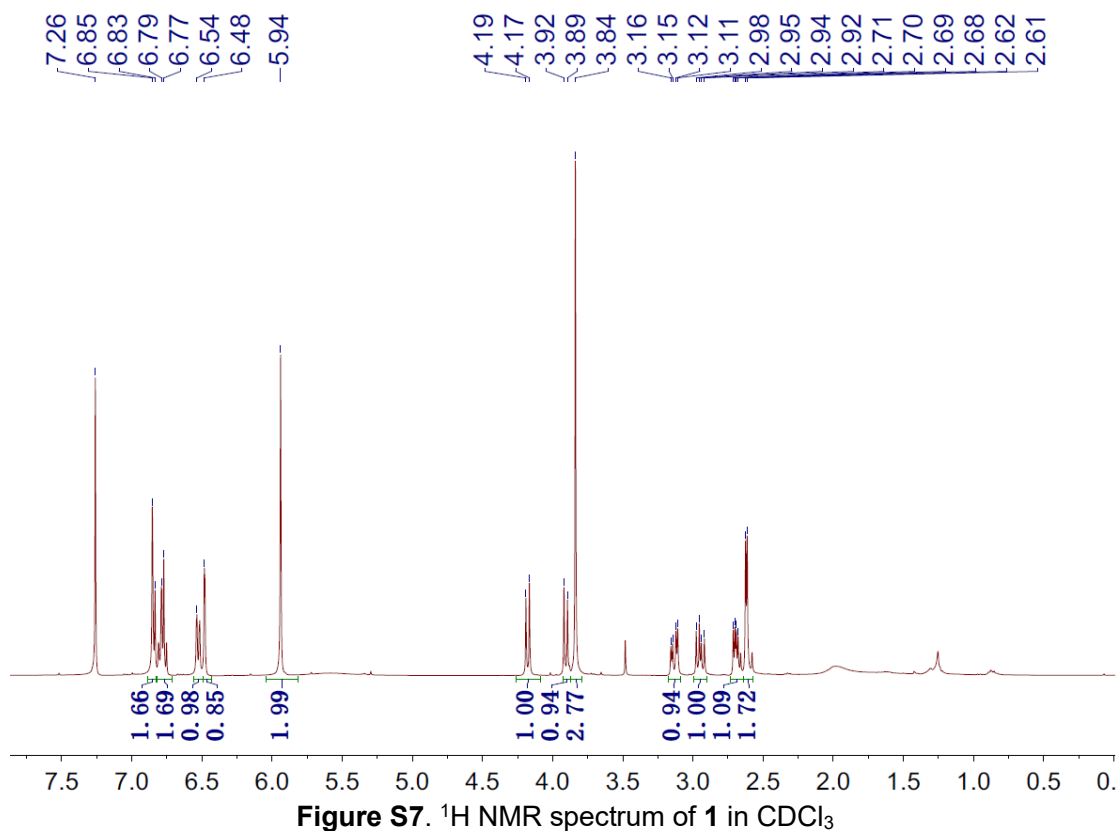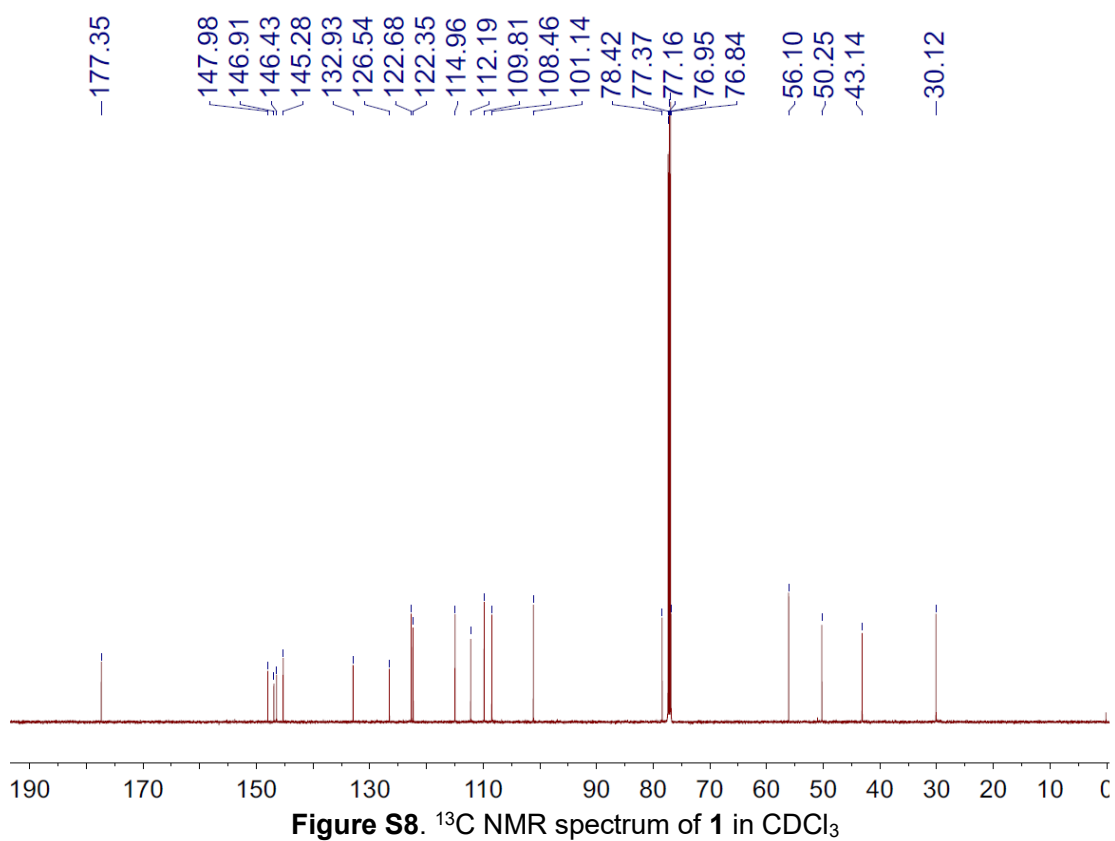

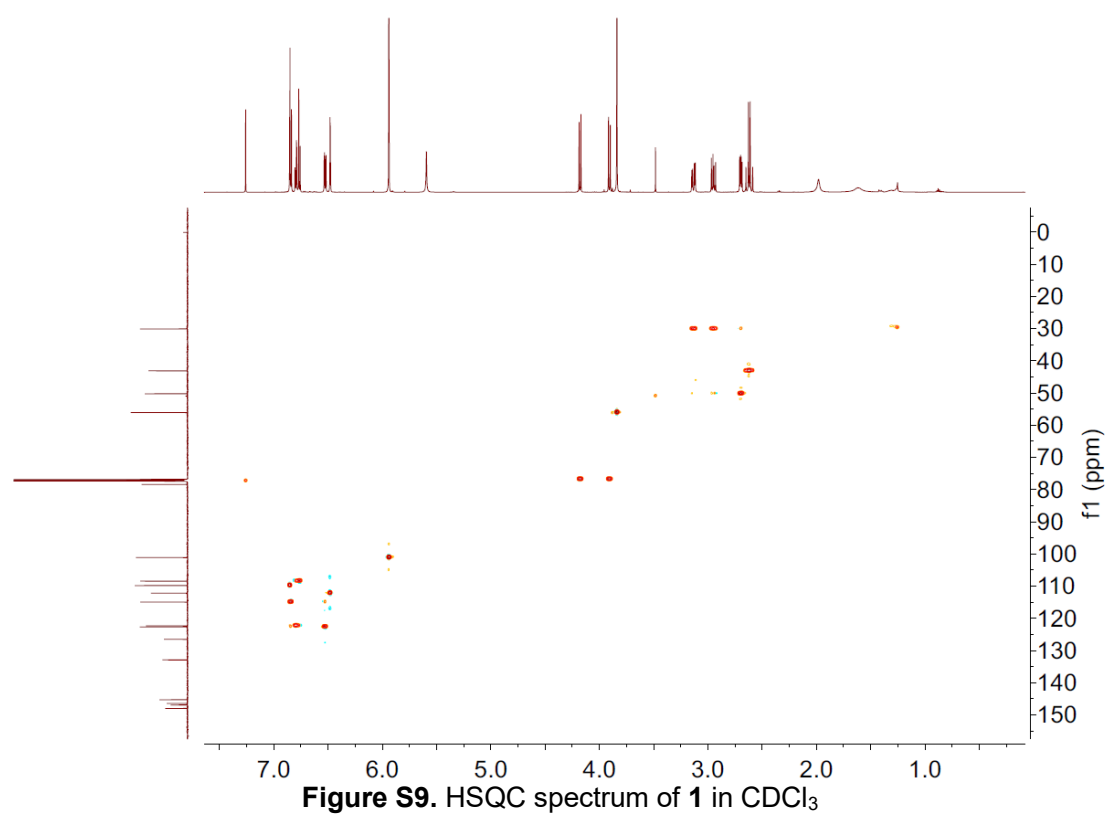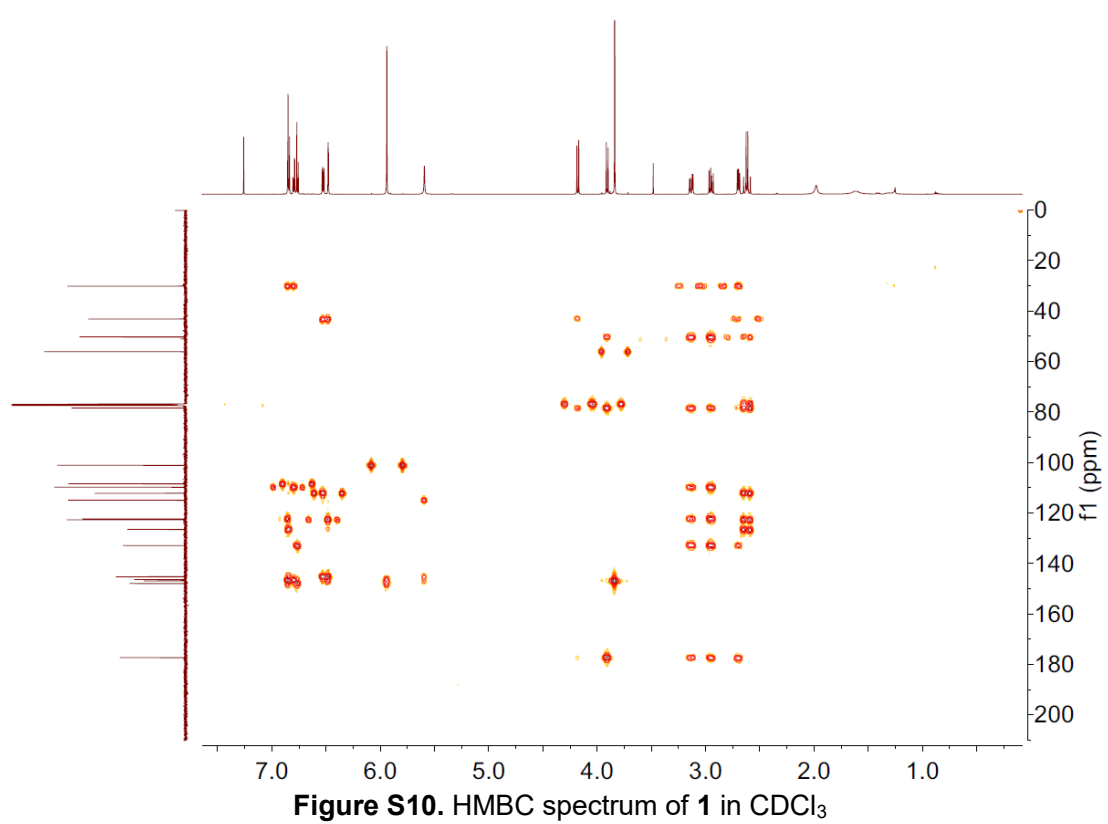

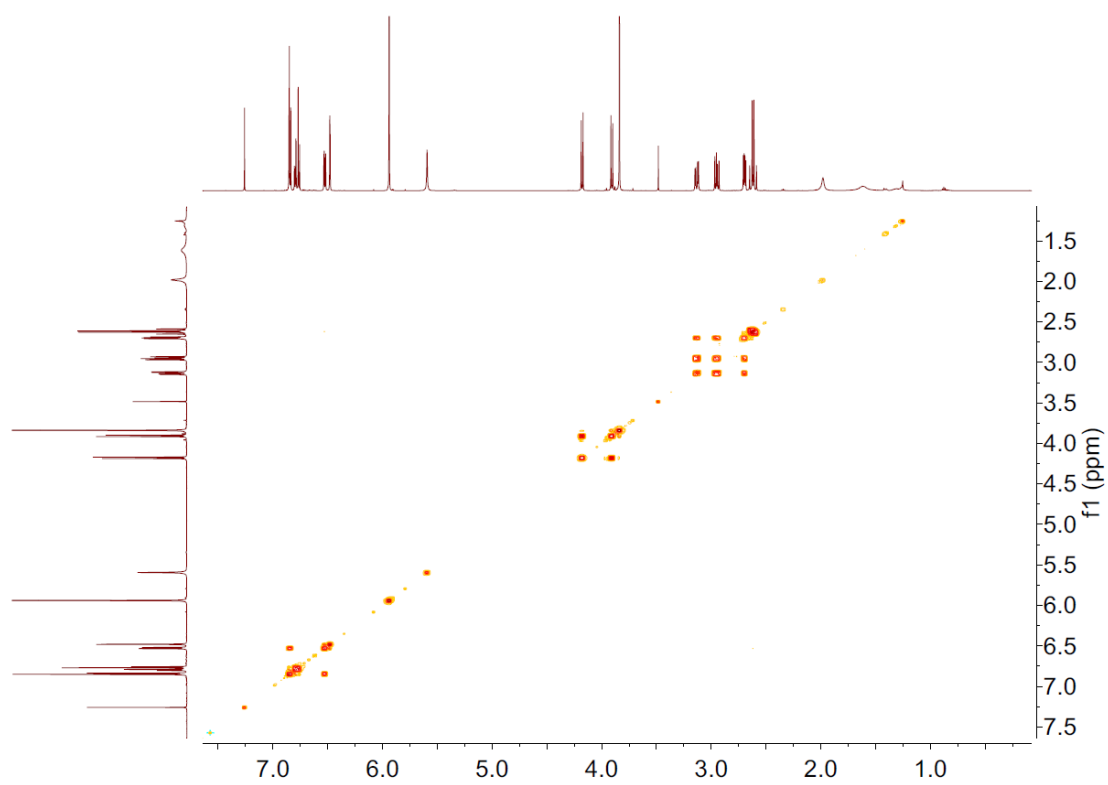

**Figure S11.**  $^1\text{H}$ - $^1\text{H}$  COSY spectrum of **1** in  $\text{CDCl}_3$

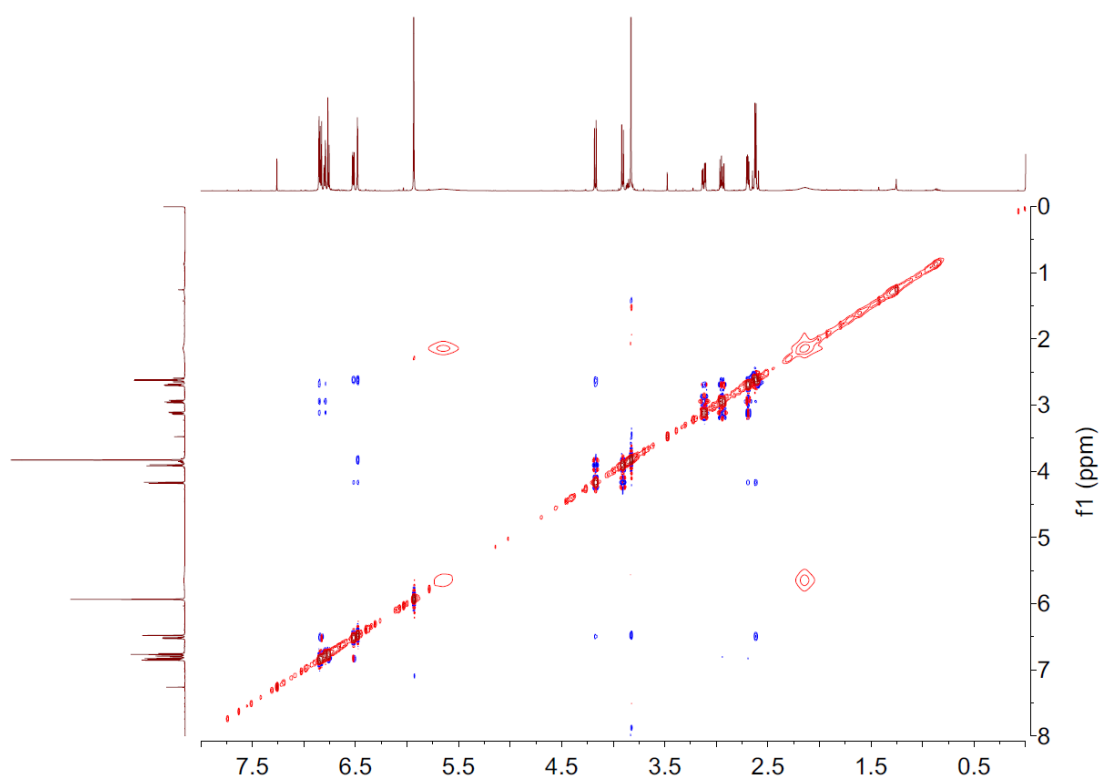

**Figure S12.** ROESY spectrum of **1** in  $\text{CDCl}_3$



## Qualitative Analysis Report

|                        |              |               |                      |
|------------------------|--------------|---------------|----------------------|
| Data Filename          | fzh-27.d     | Sample Name   | fzh-27               |
| Sample Type            | Sample       | Position      | P1-A4                |
| Instrument Name        | Instrument 1 | User Name     |                      |
| Acq Method             | s-.m         | Acquired Time | 4/15/2022 4:25:37 PM |
| IRM Calibration Status | Success      | DA Method     | PCDL.m               |
| Comment                |              |               |                      |

|                |                             |
|----------------|-----------------------------|
| Sample Group   | Info.                       |
| Acquisition SW | 6200 series TOF/6500 series |
| Version        | Q-TOF B.05.01 (B5125.2)     |

### User Spectra

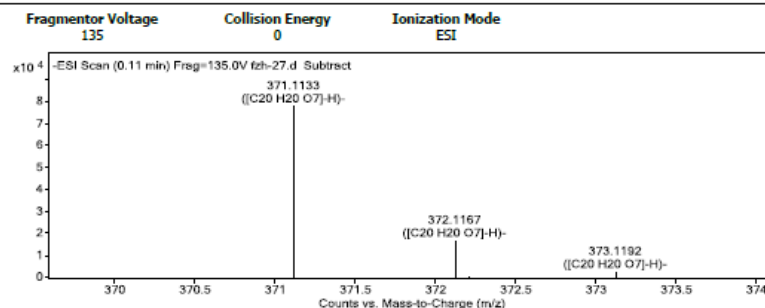

#### Peak List

| m/z       | z | Abund    | Formula    | Ion    |
|-----------|---|----------|------------|--------|
| 112.9856  | 1 | 24469.66 |            |        |
| 341.1083  | 1 | 3080.53  |            |        |
| 371.1133  | 1 | 77806.63 | C20 H20 O7 | (M-H)- |
| 372.1167  | 1 | 16677.76 | C20 H20 O7 | (M-H)- |
| 407.0884  | 1 | 4511.99  |            |        |
| 417.1186  | 1 | 21906.09 |            |        |
| 418.1235  | 1 | 5608.64  |            |        |
| 485.1062  | 1 | 12670.79 |            |        |
| 1033.9881 | 1 | 14093.31 |            |        |
| 1034.9904 | 1 | 6341.52  |            |        |

#### Formula Calculator Element Limits

| Element | Min | Max |
|---------|-----|-----|
| C       | 3   | 60  |
| H       | 0   | 120 |
| O       | 0   | 30  |

#### Formula Calculator Results

| Formula    | CalculatedMass | CalculatedMz | Mz       | Diff. (mDa) | Diff. (ppm) | DBE     |
|------------|----------------|--------------|----------|-------------|-------------|---------|
| C20 H20 O7 | 372.1209       | 371.1136     | 371.1133 | 0.30        | 0.81        | 11.0000 |

--- End Of Report ---

**Figure S13.** HRESIMS spectrum of 1

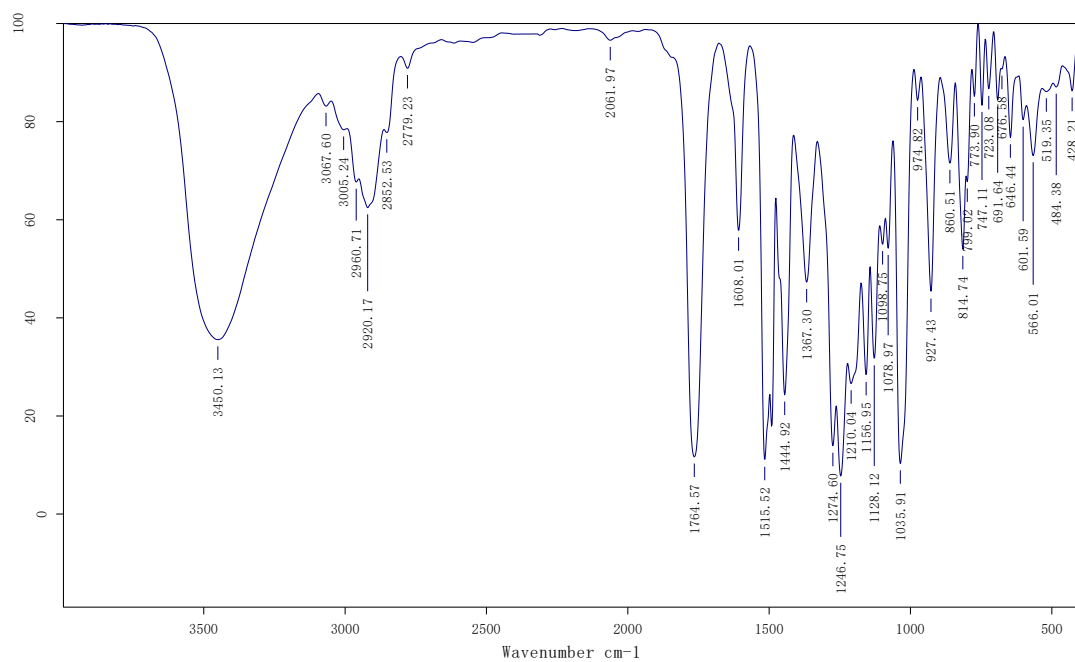

Sample Name: fzh-27  
 Sample Form: KBr  
 Path of File: E:\data  
 Date of Measurement: 2022/4/18

Resolution: 4  
 Aperture Setting: 6 mm  
 Number of Background Scans: 16  
 Number of Sample Scans: 16

Beamsplitter Setting: KBr  
 Source Setting: MIR  
 Instrument Type: BRUKER VERTEX 70  
 Soft Version: OPUS8.1

**Figure S14.** IR spectrum of **1**

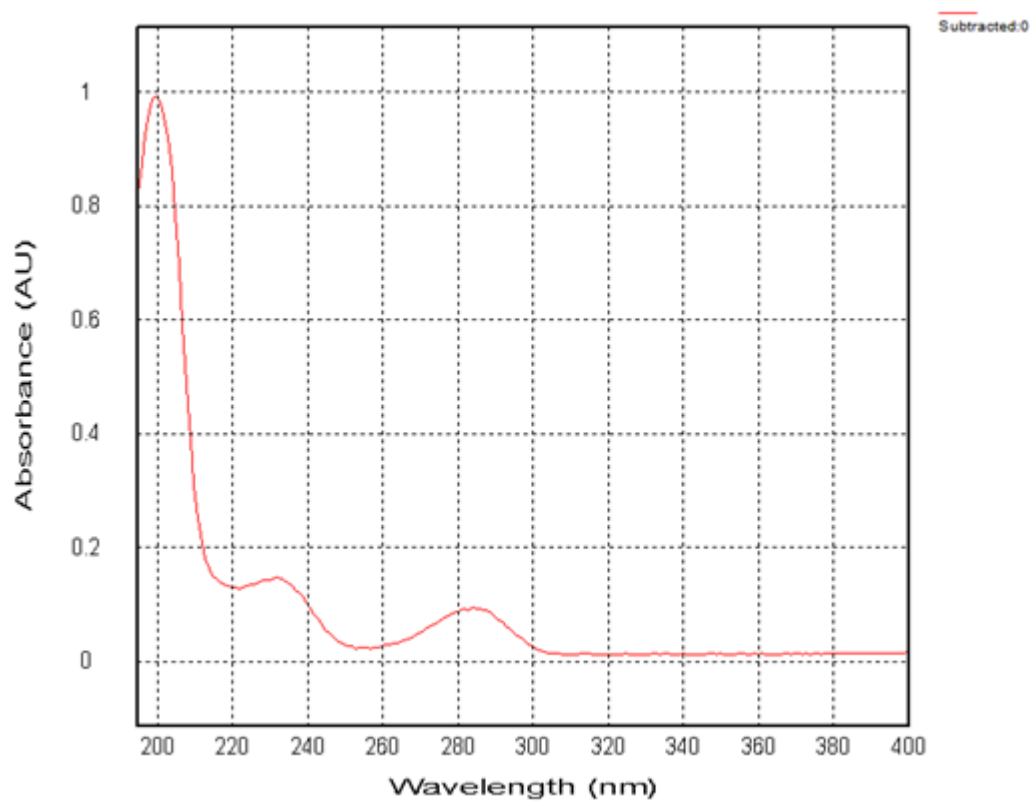

**Figure S15.** UV spectrum of **1**

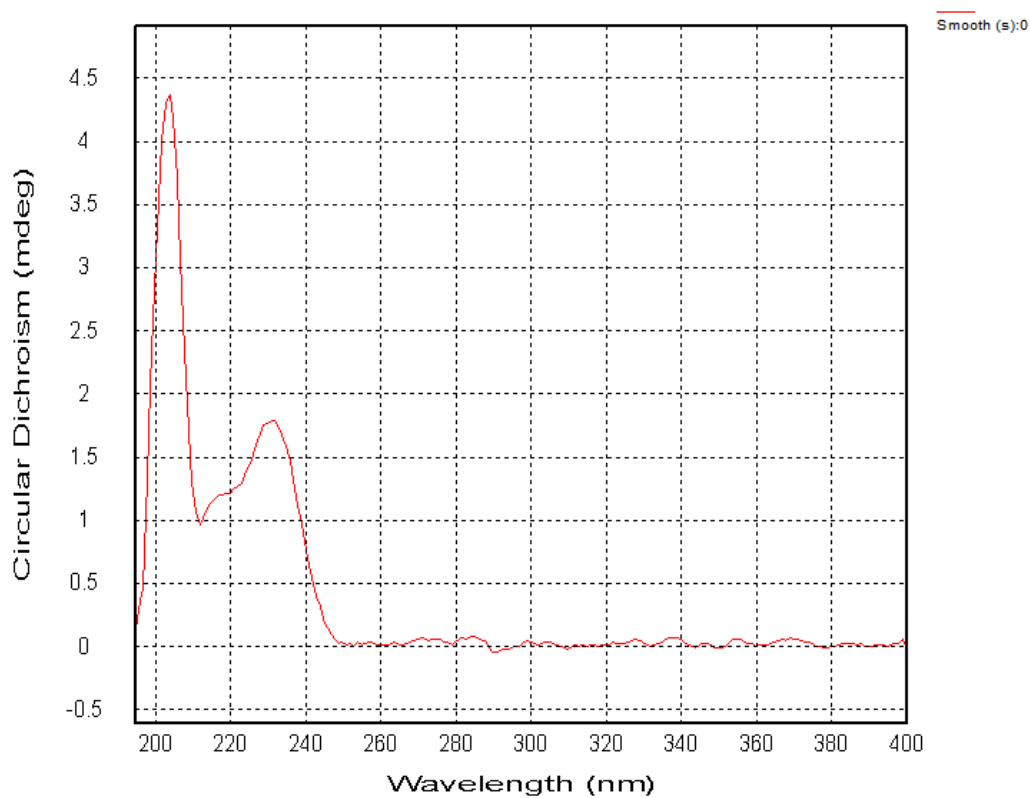

**Figure S16.** Experimental ECD curves of compounds **1**

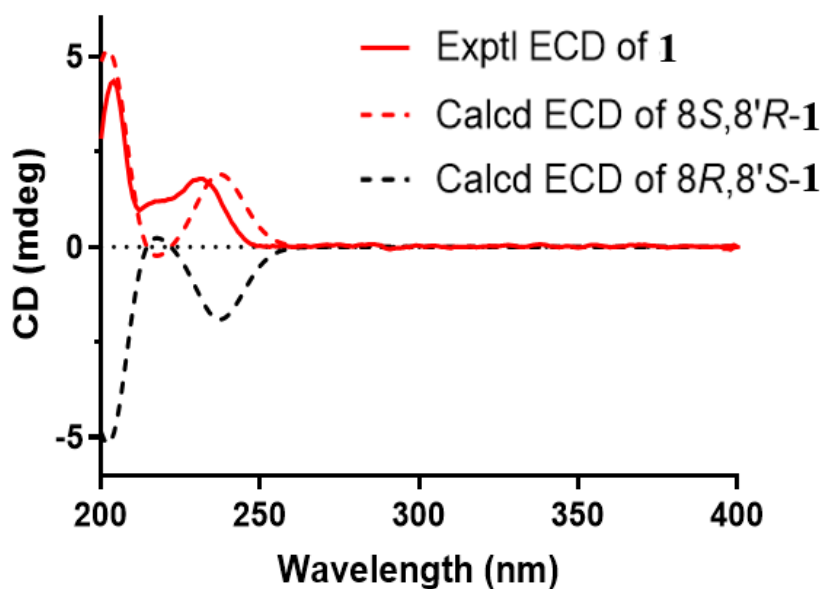

**Figure S17.** Experimental and calculated ECD spectra of **1**

The absolute configuration of **1** was studied by comparison of its experimental and simulated electronic circular dichroism (ECD) spectra using the quantum chemical time-dependent density functional theory (TDDFT)

method. As shown in Figure S17, the experimental ECD spectrum of **1** showed two significant positive Cotton effects around 204 and 231 nm, which matched well with those calculated for the (8*S*,8'*R*)-**1**, indicating that **1** possessed the same corresponding absolute configuration. Details of ECD calculations were provided as following:

#### ECD calculation method of compound **1**

Conformational analyses of (8*R*,8'*S*)-**1** were first carried out in the SYBYL-X-2.1.1 program using MMFF94s molecular force field. The stable conformers were optimized at b3lyp/6-31G(d) in the gas phase and further subjected to ECD calculations at cam-b3lyp/6-31+g(d,p) level in the PCM model of methanol using Gaussian09 program. The simulated spectra of the lowest energy conformers were averaged according to the Boltzmann distributions, and generated using SpedDis software. The spectra of (8*S*,8'*R*)-**1** were generated using the enantiomeric ECD operations by SpedDis.

#### Conformers and energy analysis

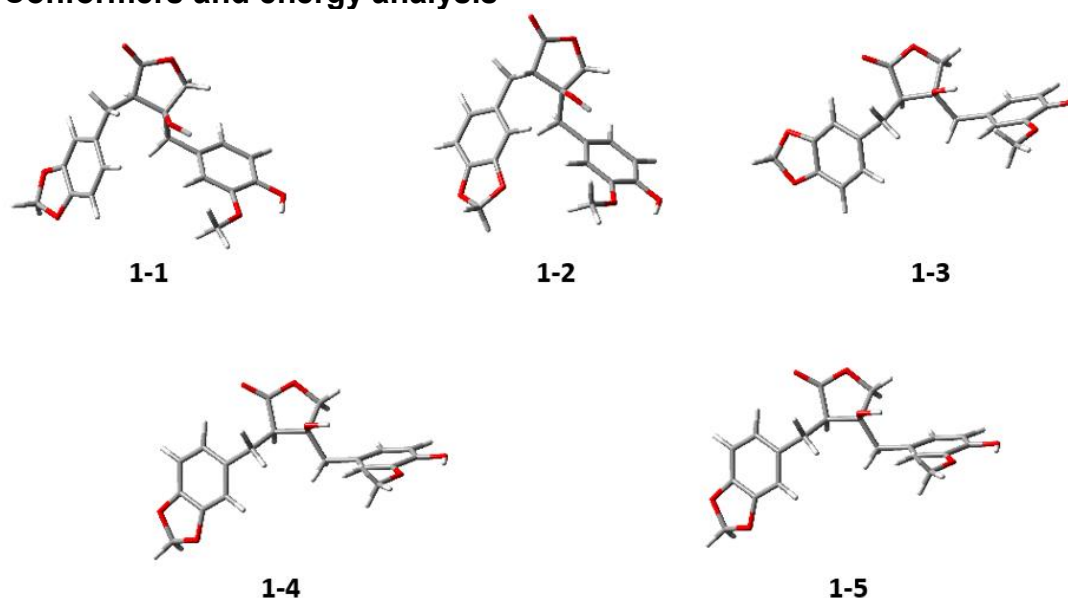

**Figure S18.** Optimized lowest energy conformers for (8*R*,8'*S*)-**1** at B3LYP/6-31G(d) level.

**Table S1.** Energy (298.15 K) analysis for (8*R*,8'*S*)-**1**.

| conformer | Energy (Hartree) | Energy (kcal/mol) | Population (%) |
|-----------|------------------|-------------------|----------------|
| 1-1       | -1300.215311     | -815897.4193      | 49.31          |
| 1-2       | -1300.214398     | -815896.8462      | 18.75          |
| 1-3       | -1300.214228     | -815896.74        | 15.67          |
| 1-4       | -1300.21361      | -815896.3518      | 8.14           |
| 1-5       | -1300.213609     | -815896.3514      | 8.13           |

**Table S2.** Calculated ECD data for (8*R*,8'*S*)-1

| states | 1-1                 |                    | 1-2                 |                    | 1-3                 |                    | 1-4                 |                    | 1-5                 |                    |
|--------|---------------------|--------------------|---------------------|--------------------|---------------------|--------------------|---------------------|--------------------|---------------------|--------------------|
|        | excitation energies | rotatory strengths | excitation energies | rotatory strengths | excitation energies | rotatory strengths | excitation energies | rotatory strengths | excitation energies | rotatory strengths |
| 1      | 4.8597              | -25.0782           | 4.9019              | -11.2136           | 4.8841              | -5.291             | 4.8941              | -18.1508           | 4.8941              | -18.1516           |
| 2      | 5.0012              | 2.3065             | 5.0156              | -1.3713            | 5.0011              | -4.5018            | 5.0017              | 7.0747             | 5.0017              | 7.0918             |
| 3      | 5.5213              | -14.2497           | 5.4631              | 19.7397            | 5.5386              | 3.6457             | 5.4917              | -1.6252            | 5.4917              | -1.6386            |
| 4      | 5.5327              | 1.4241             | 5.5304              | -0.1686            | 5.5602              | -5.818             | 5.5353              | 19.1049            | 5.5353              | 19.1228            |
| 5      | 5.5685              | 7.6587             | 5.6062              | -16.2483           | 5.5785              | 10.0594            | 5.5391              | 1.7255             | 5.5391              | 1.7175             |
| 6      | 5.6277              | -34.7902           | 5.6237              | -28.5398           | 5.6253              | -46.4445           | 5.6235              | -42.6728           | 5.6235              | -42.6809           |
| 7      | 5.9001              | -2.2655            | 5.8911              | -13.6475           | 5.9041              | -18.0581           | 5.8987              | -17.6945           | 5.8986              | -17.6821           |
| 8      | 6.1                 | -18.256            | 6.1322              | -25.0213           | 6.0991              | -14.2771           | 6.0993              | -13.5084           | 6.0992              | -13.5068           |
| 9      | 6.2185              | 5.0354             | 6.199               | -0.1103            | 6.1471              | 1.1297             | 6.145               | -0.7125            | 6.145               | -0.7134            |
| 10     | 6.2282              | 6.256              | 6.2786              | 3.2449             | 6.2735              | -3.7759            | 6.2794              | -1.0819            | 6.2794              | -1.0822            |

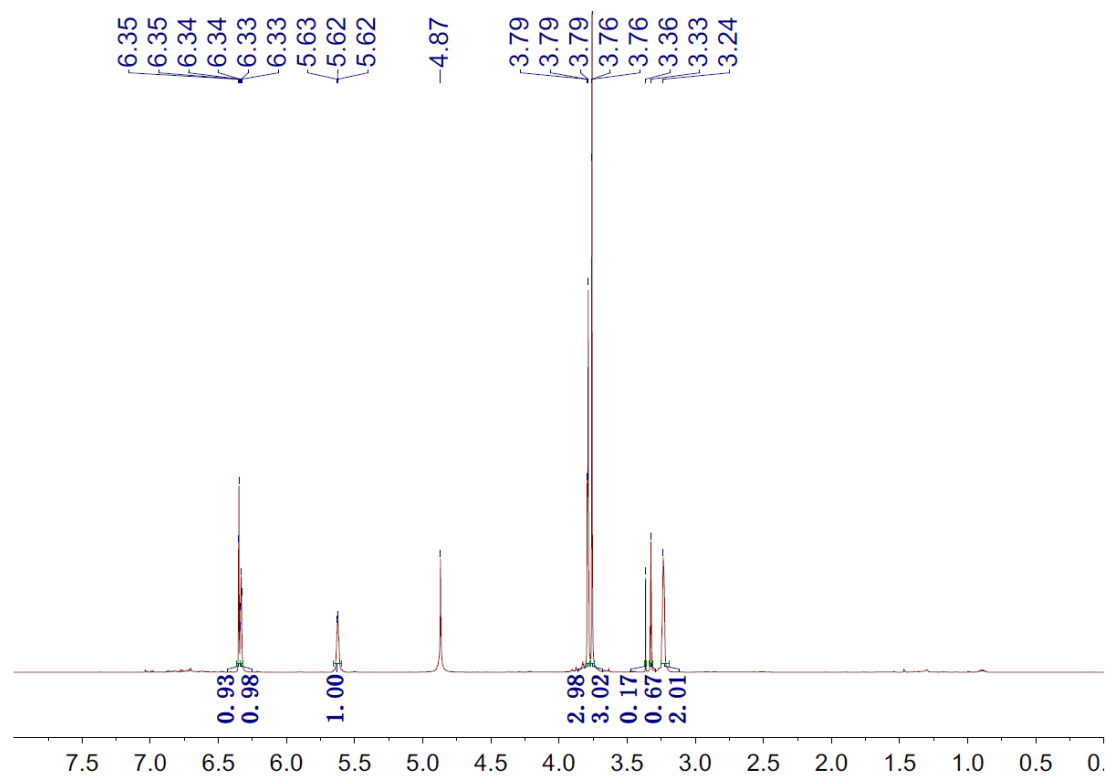

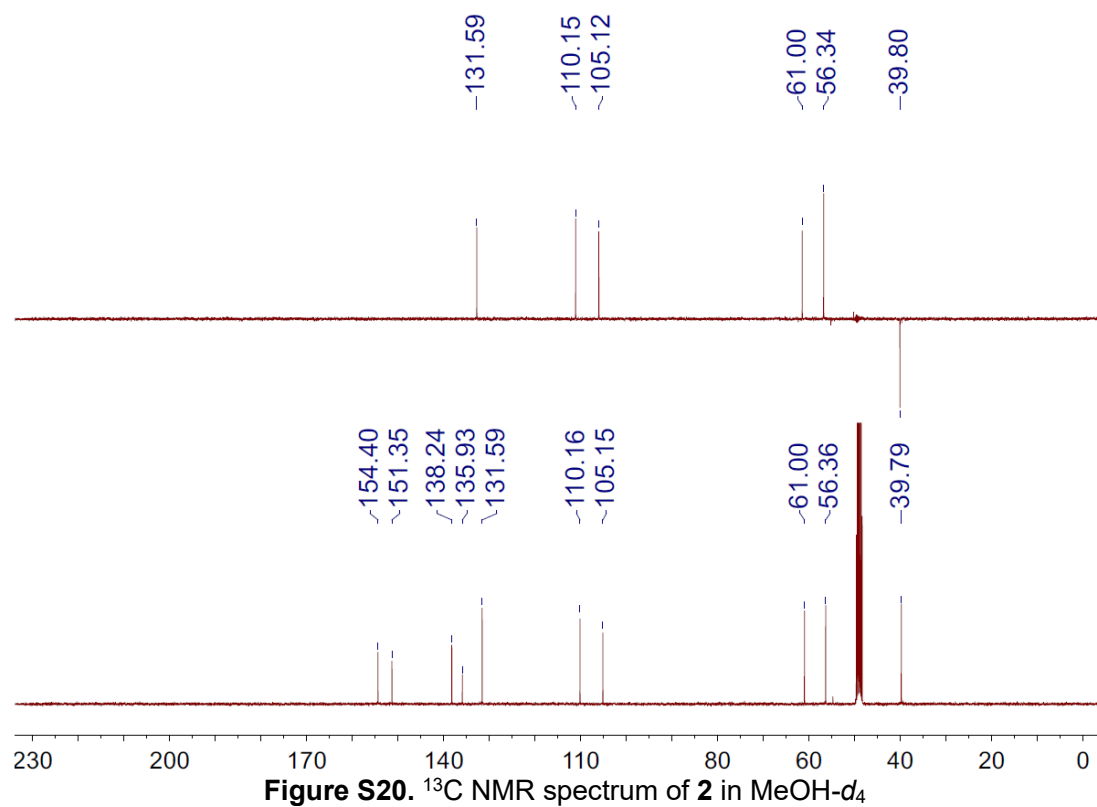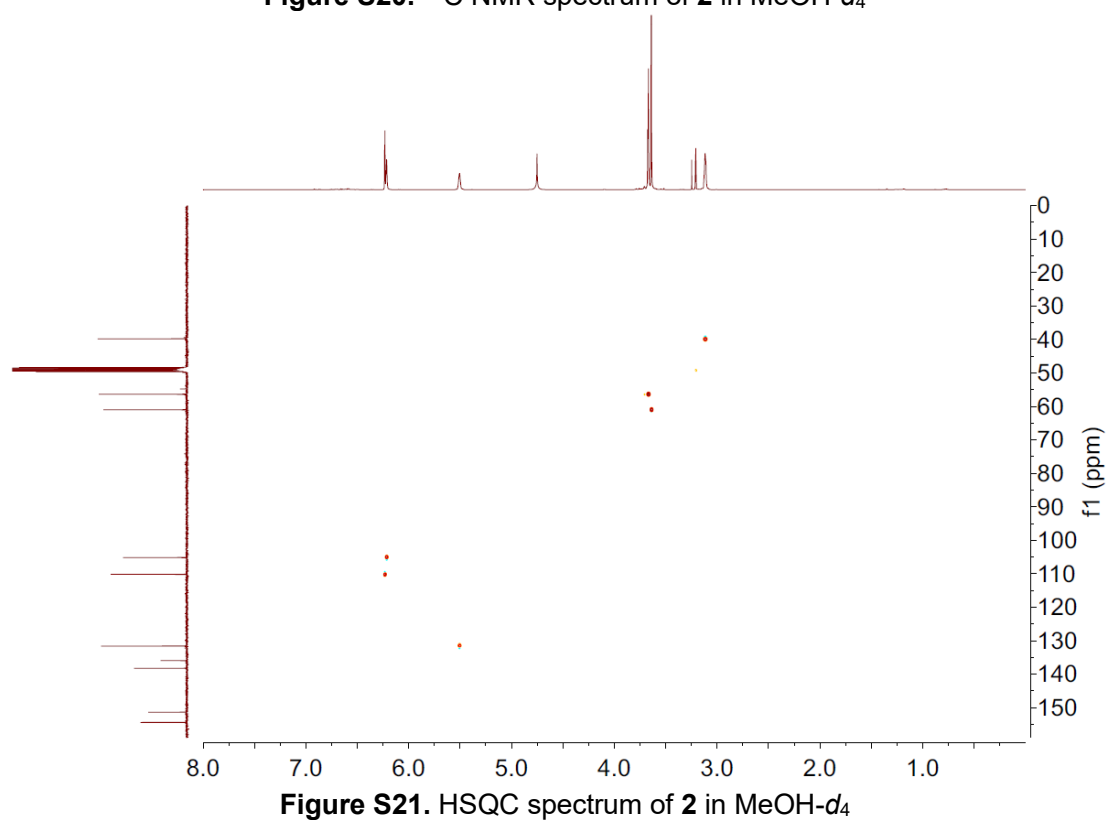

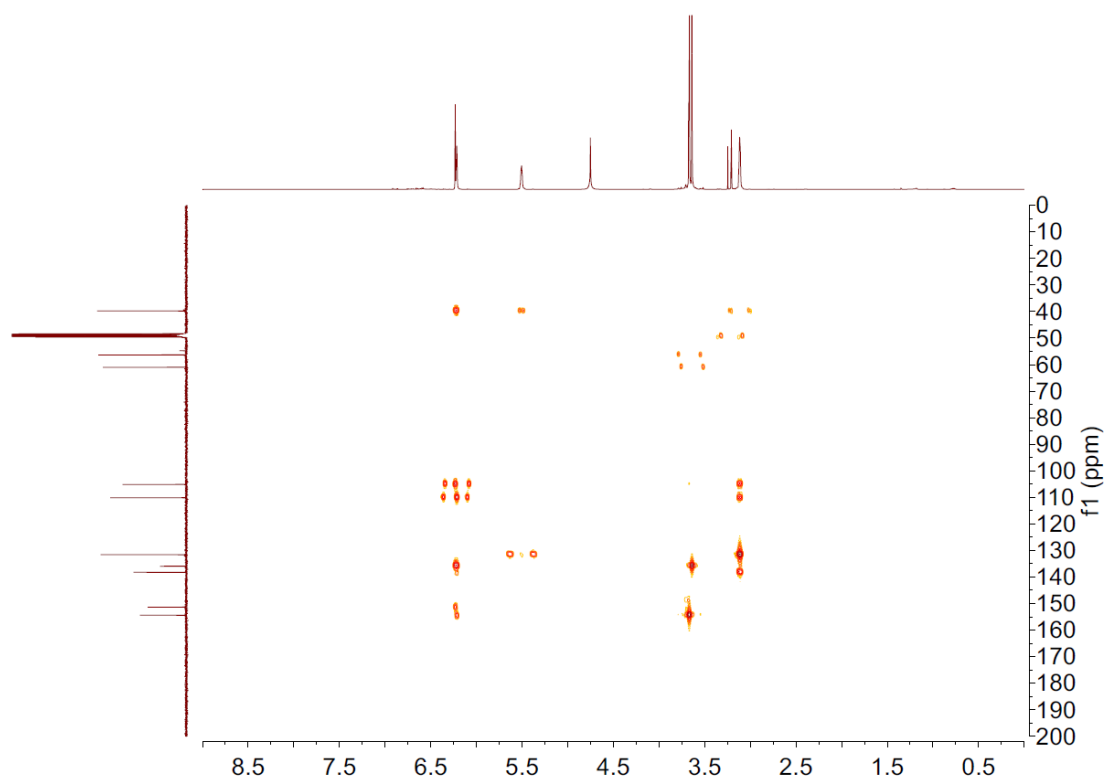

**Figure S22.** HMBC spectrum of **2** in MeOH- $d_4$

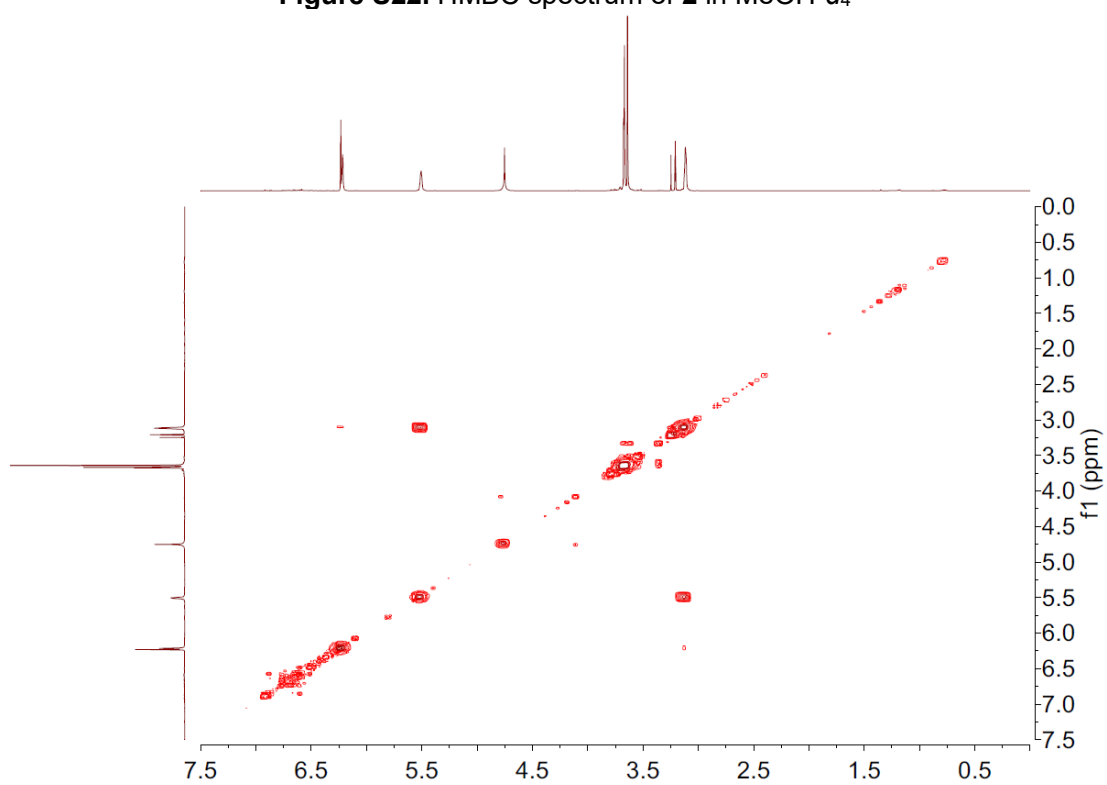

**Figure S23.**  $^1\text{H}$ - $^1\text{H}$  COSY spectrum of **2** in MeOH- $d_4$

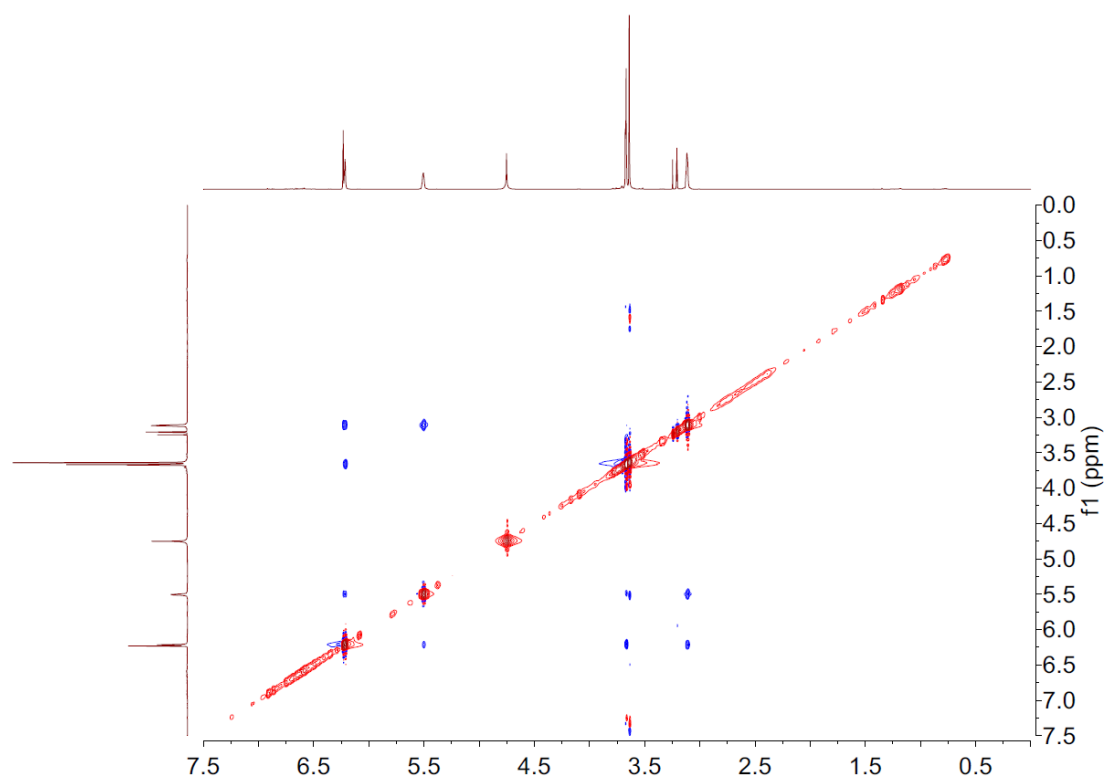

**Figure S24.** ROESY spectrum of **2** in MeOH- $d_4$



## Qualitative Analysis Report

|                        |              |               |                      |
|------------------------|--------------|---------------|----------------------|
| Data Filename          | fzh-25.d     | Sample Name   | fzh-25               |
| Sample Type            | Sample       | Position      | P1-A3                |
| Instrument Name        | Instrument 1 | User Name     |                      |
| Acq Method             | s-.m         | Acquired Time | 4/15/2022 4:24:27 PM |
| IRM Calibration Status | Success      | DA Method     | PCDL.m               |
| Comment                |              |               |                      |

|                |                             |       |
|----------------|-----------------------------|-------|
| Sample Group   |                             | Info. |
| Acquisition SW | 6200 series TOF/6500 series |       |
| Version        | Q-TOF B.05.01 (B5125.2)     |       |

### User Spectra

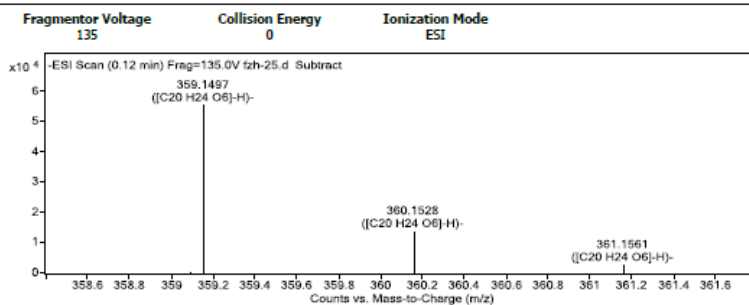

#### Peak List

| m/z       | z | Abund    | Formula    | Ion    |
|-----------|---|----------|------------|--------|
| 68.9958   | 1 | 4582.38  |            |        |
| 89.0244   | 1 | 3589.3   |            |        |
| 112.9856  | 1 | 4662.08  |            |        |
| 248.96    | 1 | 7709.95  |            |        |
| 359.1497  | 1 | 55558.7  | C20 H24 O6 | (M-H)- |
| 360.1528  | 1 | 13890.06 | C20 H24 O6 | (M-H)- |
| 391.1395  | 1 | 5741.64  |            |        |
| 495.2028  | 1 | 3120.57  |            |        |
| 681.2955  | 1 | 4889.1   |            |        |
| 1034.9905 | 1 | 3900.38  |            |        |

#### Formula Calculator Element Limits

| Element | Min | Max |
|---------|-----|-----|
| C       | 3   | 60  |
| H       | 0   | 120 |
| O       | 0   | 30  |

#### Formula Calculator Results

| Formula    | CalculatedMass | CalculatedMz | Mz       | Diff. (mDa) | Diff. (ppm) | DBE    |
|------------|----------------|--------------|----------|-------------|-------------|--------|
| C20 H24 O6 | 360.1573       | 359.1500     | 359.1497 | 0.30        | 0.84        | 9.0000 |

--- End Of Report ---

Figure S25. HRESIMS spectrum of 2

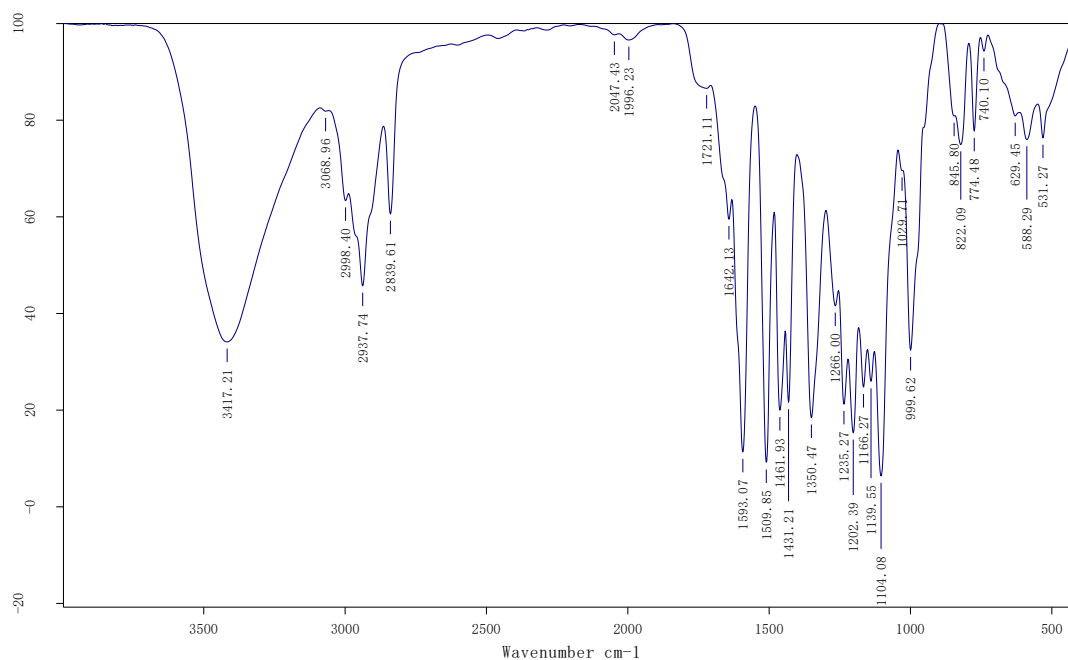

|                                |                                |                                   |
|--------------------------------|--------------------------------|-----------------------------------|
| Sample Name: fzh-25            | Resolution: 4                  | Beamsplitter Setting: KBr         |
| Sample Form: KBr               | Aperture Setting: 6 mm         | Source Setting: MIR               |
| Path of File: E:\data          | Number of Background Scans: 16 | Instrument Type: BRUKER VERTEX 70 |
| Date of Measurement: 2022/4/18 | Number of Sample Scans: 16     | Soft Version: OPUS8.1             |

**Figure S26. IR spectrum of 2**

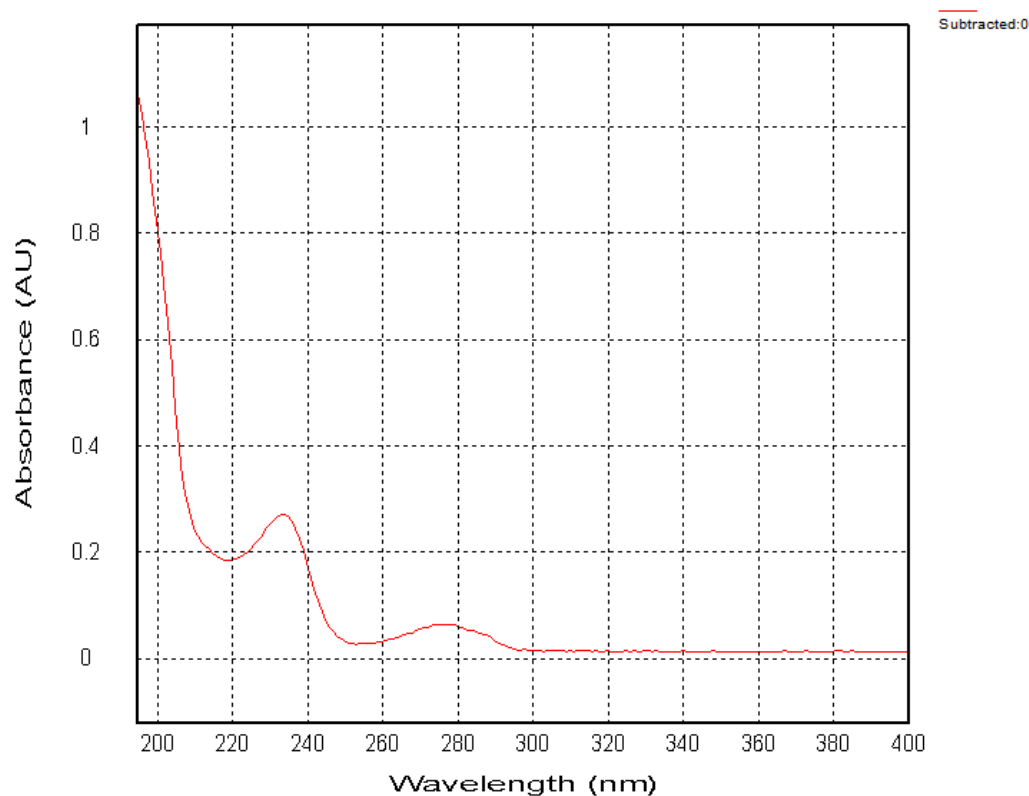

**Figure S27. UV spectrum of 2**

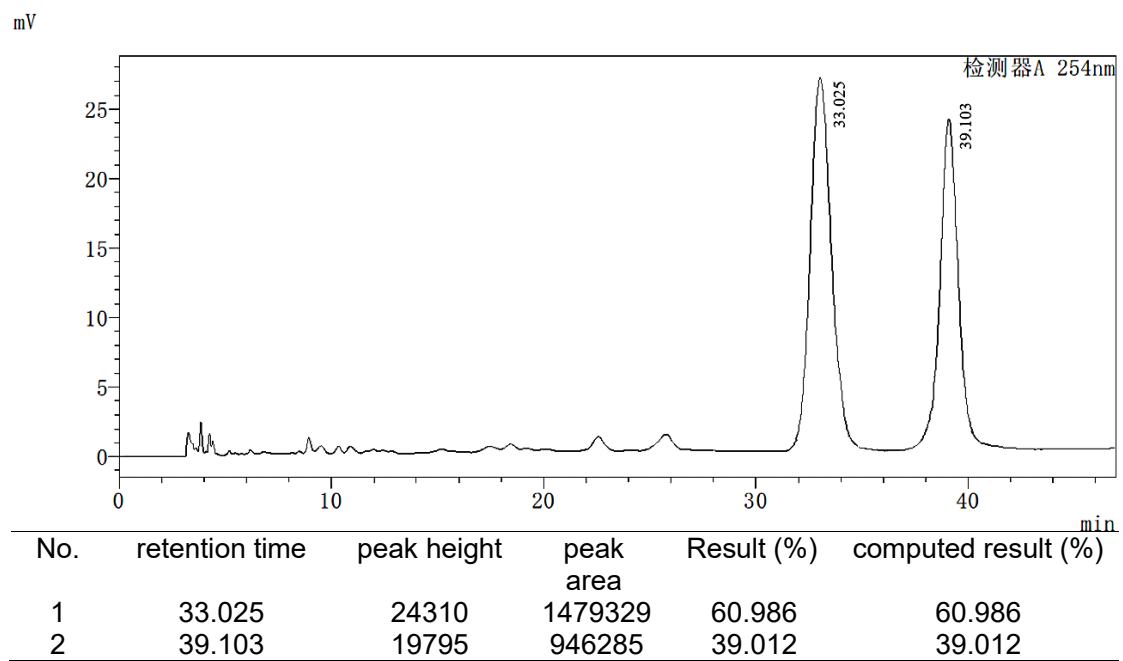

**Figure S28.** HPLC analysis of **3** by a chiral-pak IA column (mobile phase: *n*-hexane/isopropyl alcohol 85:1, v/v, flow rate: 1 mL/min).

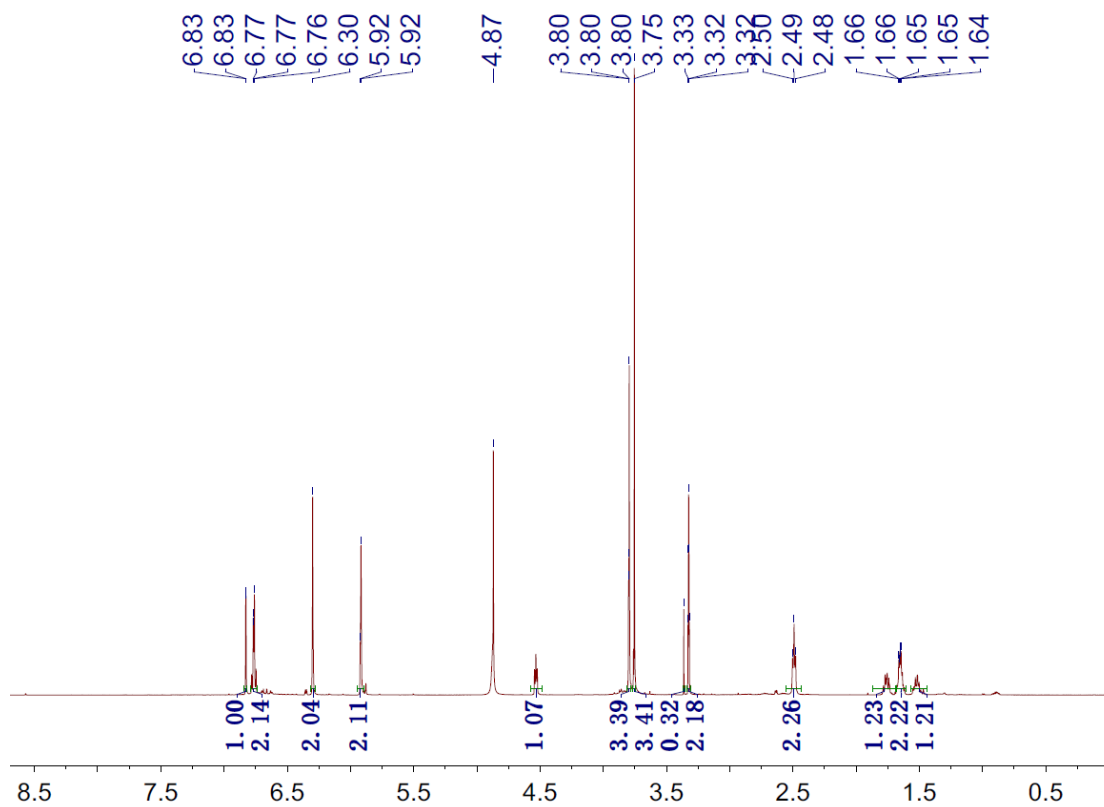

**Figure S29.** <sup>1</sup>H NMR spectrum of **3** in MeOH-*d*<sub>4</sub>

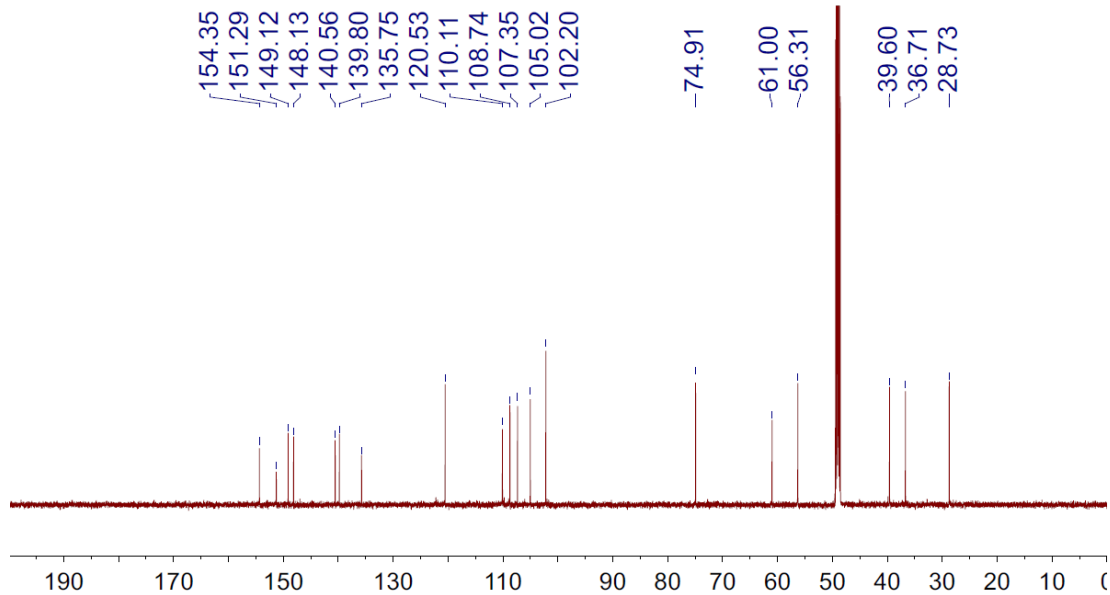

**Figure S30.** <sup>13</sup>C NMR spectrum of **3** in MeOH-*d*<sub>4</sub>

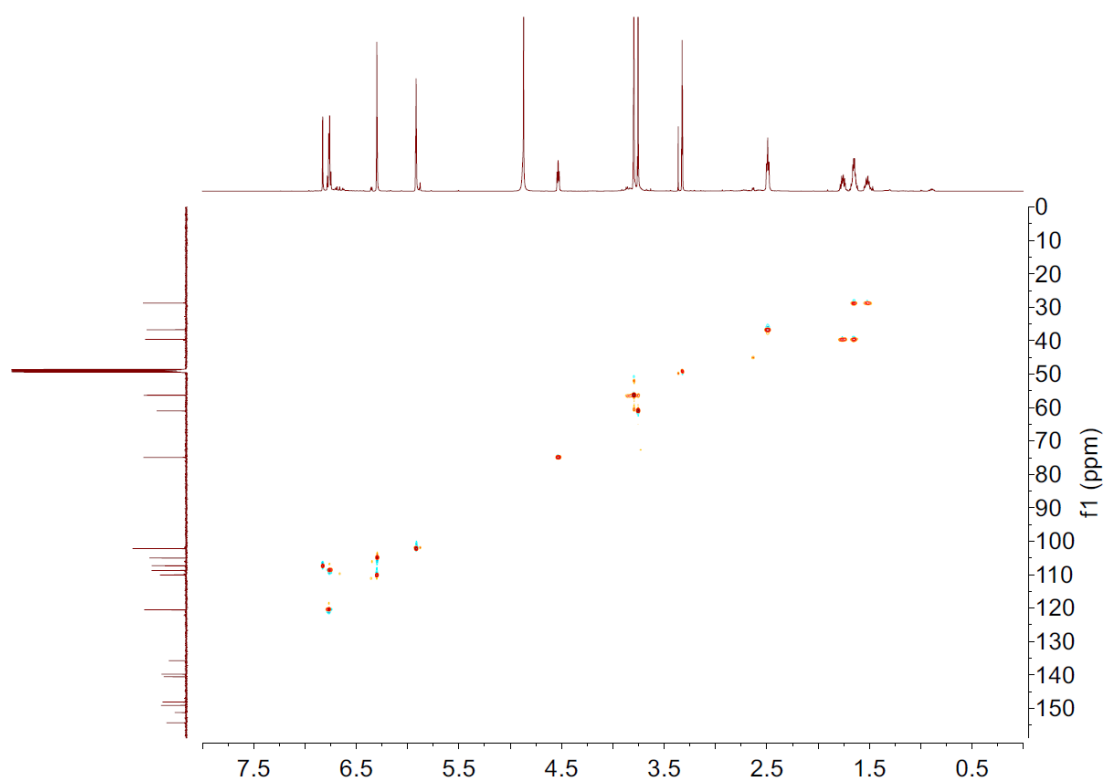

**Figure S31.** HSQC spectrum of **3** in MeOH- $d_4$

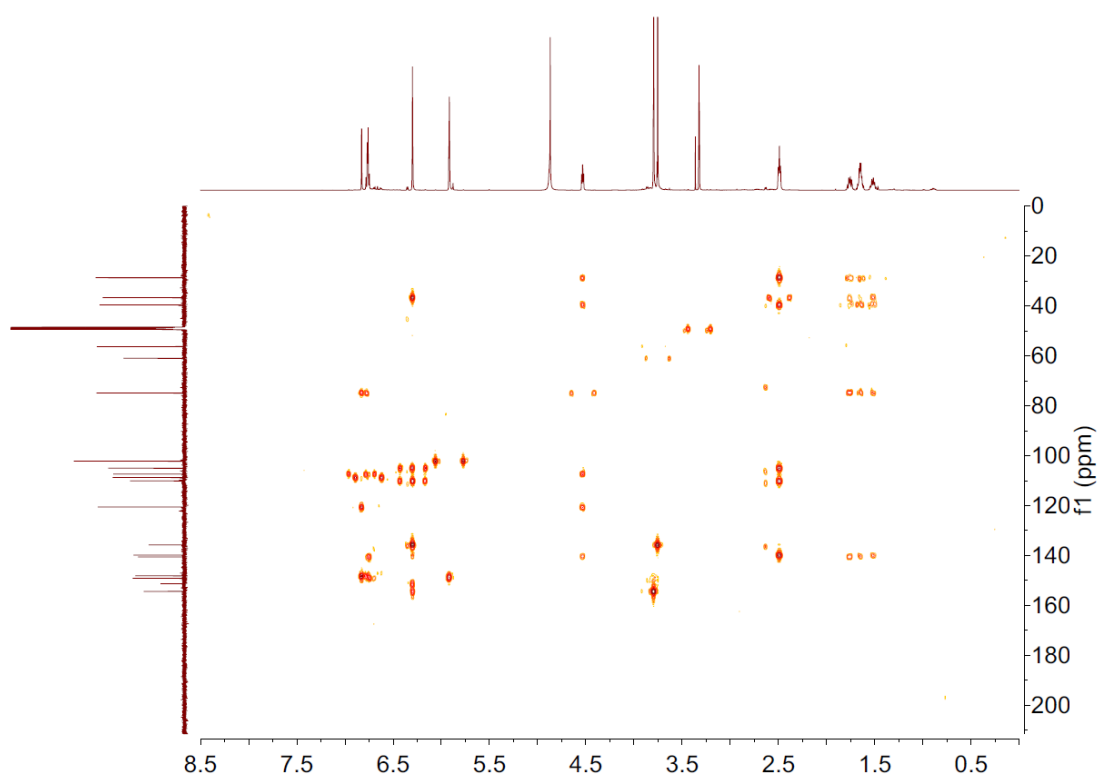

**Figure S32.** HMBC spectrum of **3** in MeOH- $d_4$

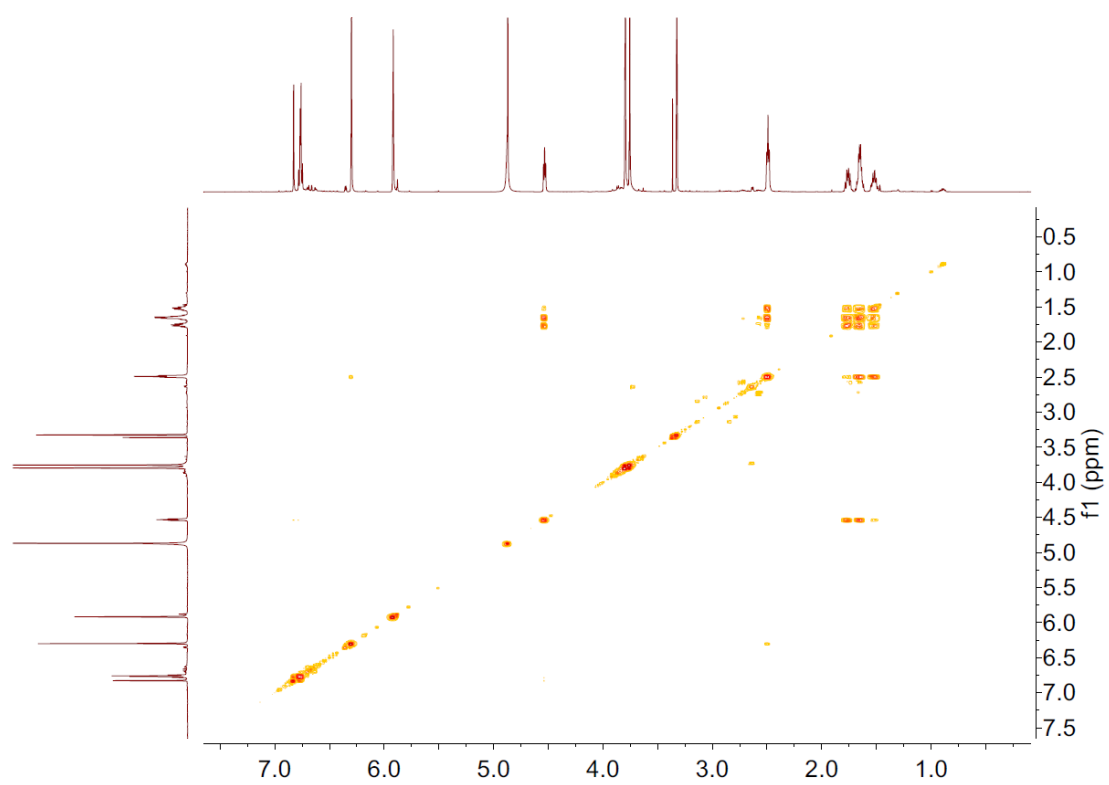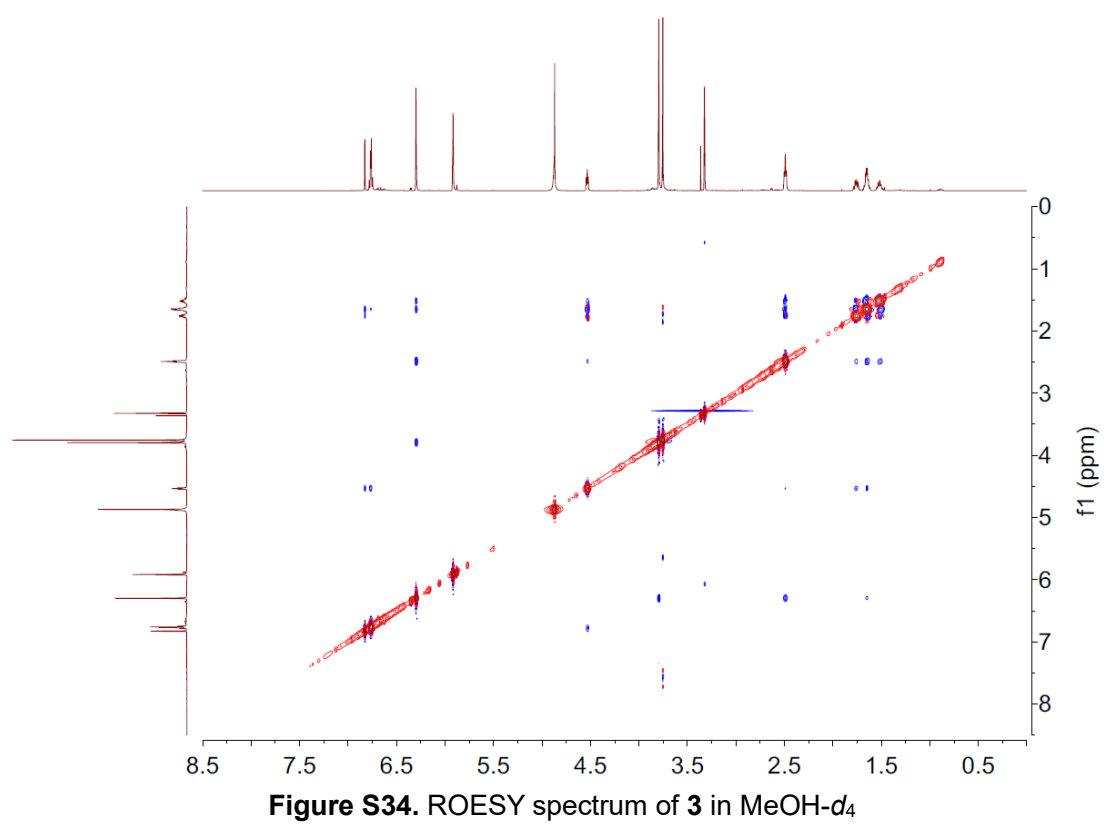

## Qualitative Analysis Report

|                        |              |               |                      |
|------------------------|--------------|---------------|----------------------|
| Data Filename          | fzh-23.d     | Sample Name   | fzh-23               |
| Sample Type            | Sample       | Position      | P1-A6                |
| Instrument Name        | Instrument 1 | User Name     |                      |
| Acq Method             | s-.m         | Acquired Time | 4/15/2022 4:27:57 PM |
| IRM Calibration Status | Success      | DA Method     | PCDL.m               |
| Comment                |              |               |                      |

|                |                             |
|----------------|-----------------------------|
| Sample Group   | Info.                       |
| Acquisition SW | 6200 series TOF/6500 series |
| Version        | Q-TOF B.05.01 (B5125.2)     |

### User Spectra

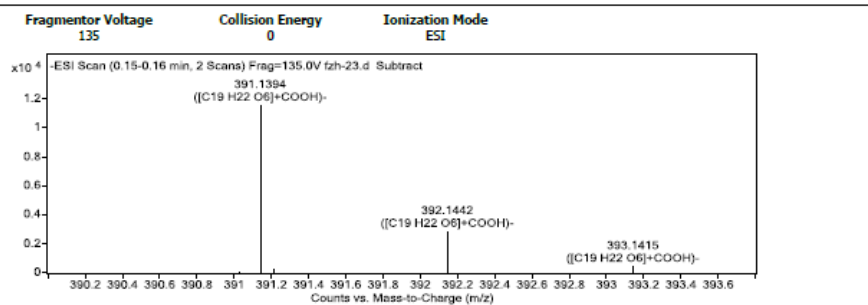

#### Peak List

| m/z      | z | Abund    | Formula    | Ion       |
|----------|---|----------|------------|-----------|
| 89.0243  | 1 | 4327.62  |            |           |
| 112.9856 | 1 | 7537.66  |            |           |
| 154.9733 | 1 | 3112.79  |            |           |
| 174.9557 | 1 | 4323.54  |            |           |
| 248.9598 | 1 | 4478.24  |            |           |
| 345.1334 | 1 | 7207.59  |            |           |
| 391.1394 | 1 | 11556.99 | C19 H22 O6 | (M+COOH)- |
| 392.1442 | 1 | 2893.67  | C19 H22 O6 | (M+COOH)- |
| 681.2953 | 1 | 5033.48  |            |           |
| 729.2553 | 1 | 2400.01  |            |           |

#### Formula Calculator Element Limits

| Element | Min | Max |
|---------|-----|-----|
| C       | 3   | 60  |
| H       | 0   | 120 |
| O       | 0   | 30  |

#### Formula Calculator Results

| Formula    | CalculatedMass | CalculatedMz | Mz       | Diff. (mDa) | Diff. (ppm) | DBE    |
|------------|----------------|--------------|----------|-------------|-------------|--------|
| C19 H22 O6 | 346.1416       | 391.1398     | 391.1394 | 0.40        | 1.02        | 9.0000 |

--- End Of Report ---

**Figure S35.** HRESIMS spectrum of **3**

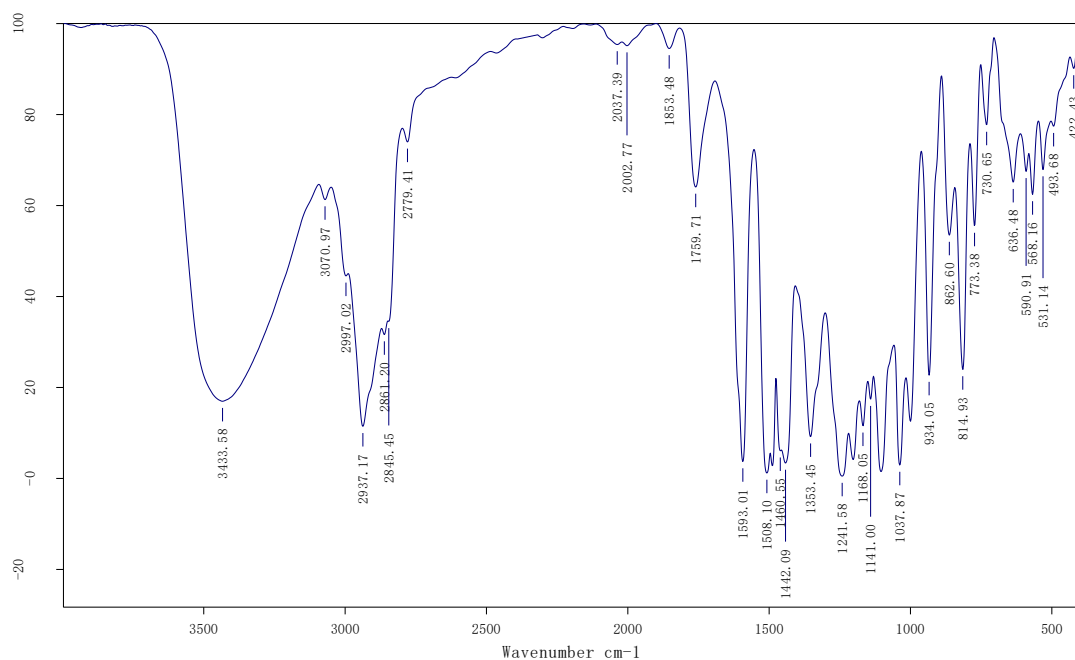

Sample Name: fzh-23  
 Sample Form: KBr  
 Path of File: E:\data  
 Date of Measurement: 2022/4/18

Resolution: 4  
 Aperture Setting: 6 mm  
 Number of Background Scans: 16  
 Number of Sample Scans: 16

Beamsplitter Setting: KBr  
 Source Setting: MIR  
 Instrument Type: BRUKER VERTEX 70  
 Soft Version: OPUS8.1

**Figure S36. IR spectrum of 3**

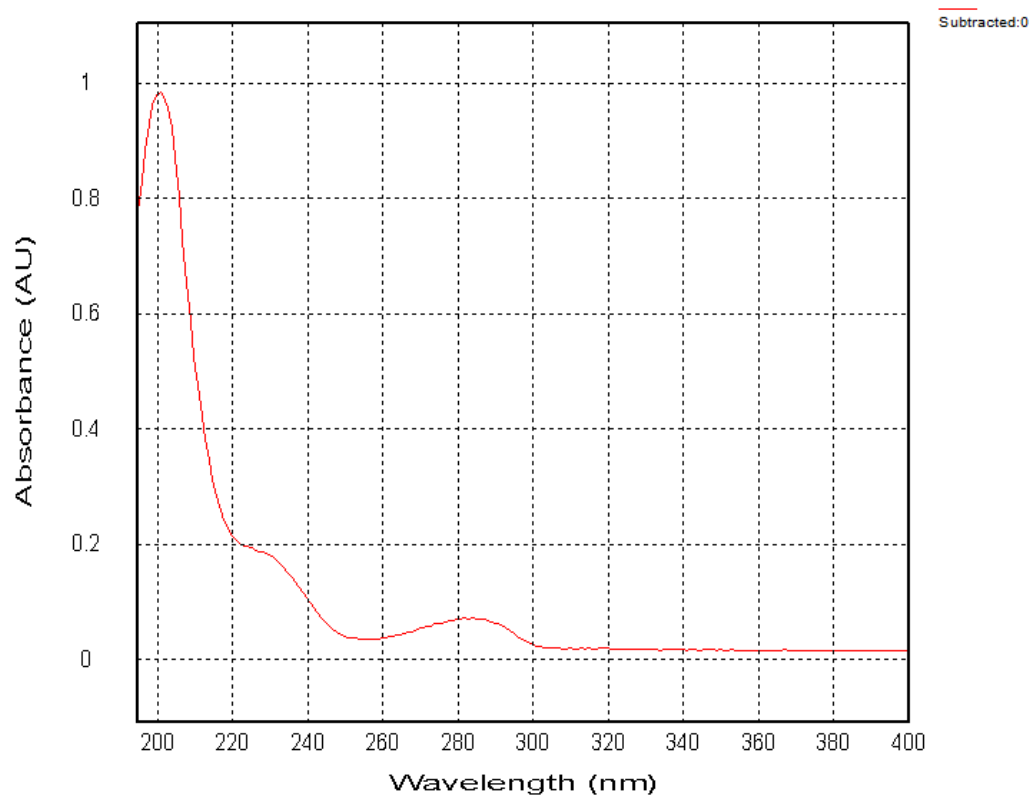

**Figure S37. UV spectrum of 3**



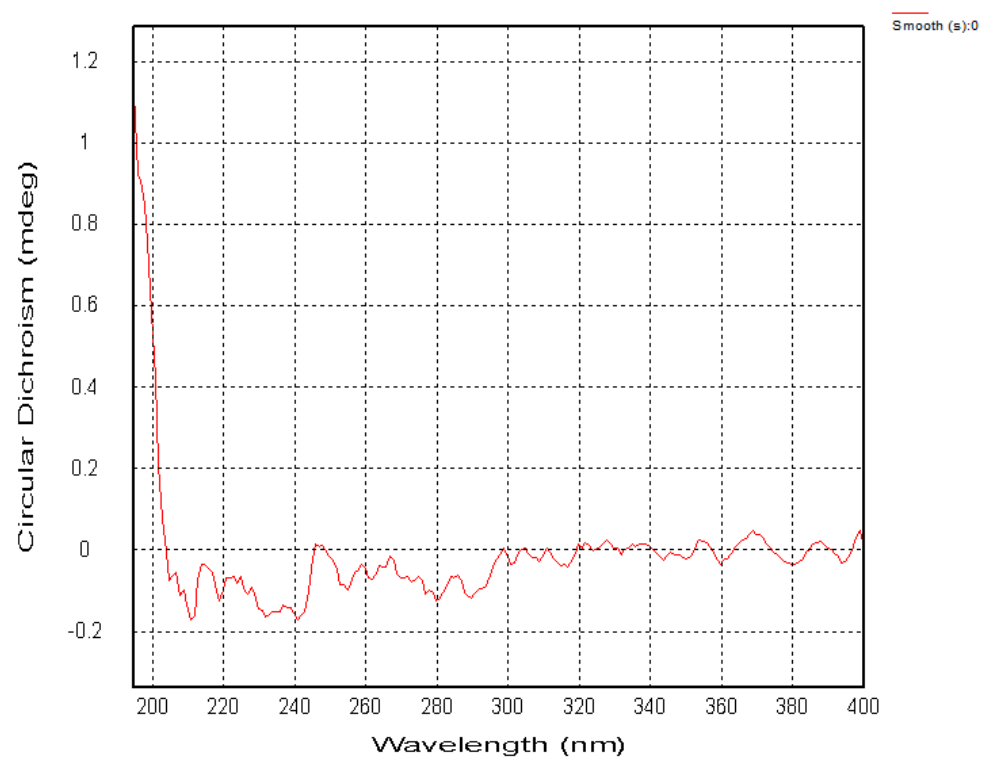

**Figure S38.** Experimental ECD curves of compounds **3**
